# Supplementary material for: Multicomponent synthesis of new curcumin-based pyrano[2,3-d]pyrimidine derivatives using a nano-magnetic solid acid catalyst
Source: Royal Society of Chemistry journal article supplement (doi:10.1039/c7nj02370g), 2017-01-01

# Multicomponent synthesis of new curcumin-based pyrano[2,3-d]pyrimidine derivatives using a nano-magnetic solid acid catalyst

*Farhad Panahi,<sup>a,b,c,\*</sup> Samira Sarikhani,<sup>a</sup> Esmaeil Niknam,<sup>a</sup> Fatemeh Haghghi,<sup>a</sup> and Ali Khalafi-Nezhad<sup>a,\*</sup>*

a. Chemistry Department, College of Sciences, Shiraz University, Shiraz 71454, Iran.

b. Mahshahr Campus, Amirkabir University of Technology, Mahshahr, Iran.

c. Department of Polymer Engineering and Color Technology, Amirkabir University of Technology, Tehran, Iran.

\*Emails: [fpanahi@aut.ac.ir](mailto:fpanahi@aut.ac.ir) ; [khalafi@chem.susc.ac.ir](mailto:khalafi@chem.susc.ac.ir),

**FT-IR of Fe<sub>3</sub>O<sub>4</sub>, Fe<sub>3</sub>O<sub>4</sub>@SiO<sub>2</sub>, VMNP, MNPO, catalyst and Sulfanilic acid**

**Copy of <sup>1</sup>H NMR, <sup>13</sup>C NMR & IR Spectra of synthesized compounds**

# FT-IR of Fe<sub>3</sub>O<sub>4</sub>

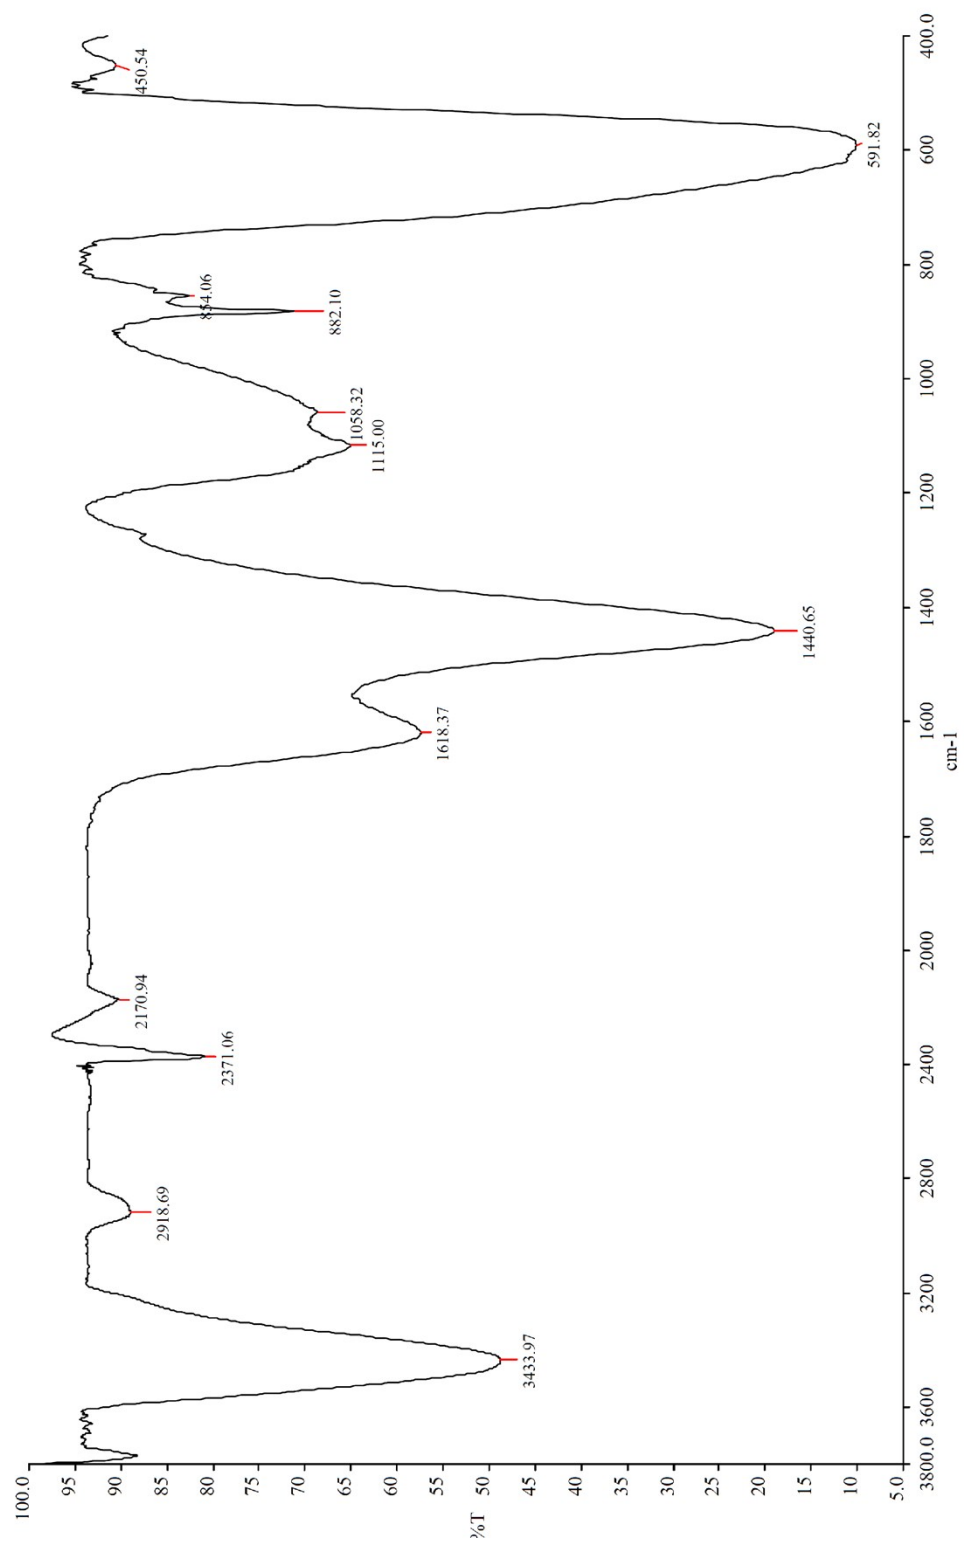

# FTIR of Fe<sub>3</sub>O<sub>4</sub>@SiO<sub>2</sub>

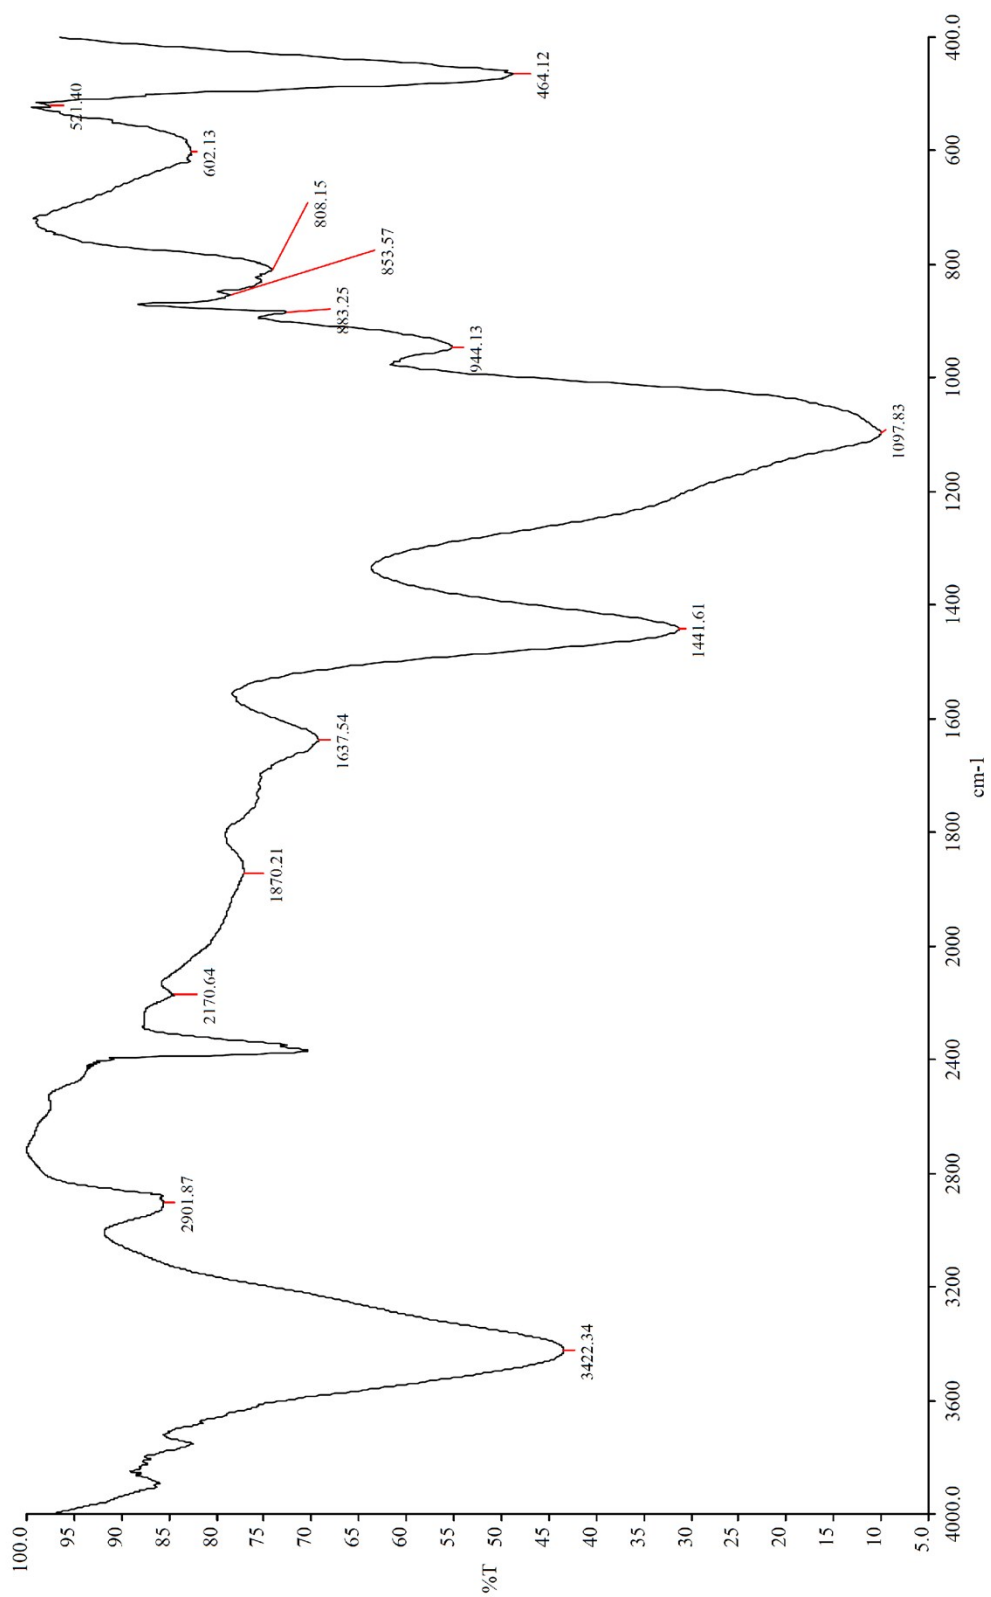

# FT-IR of VMNP

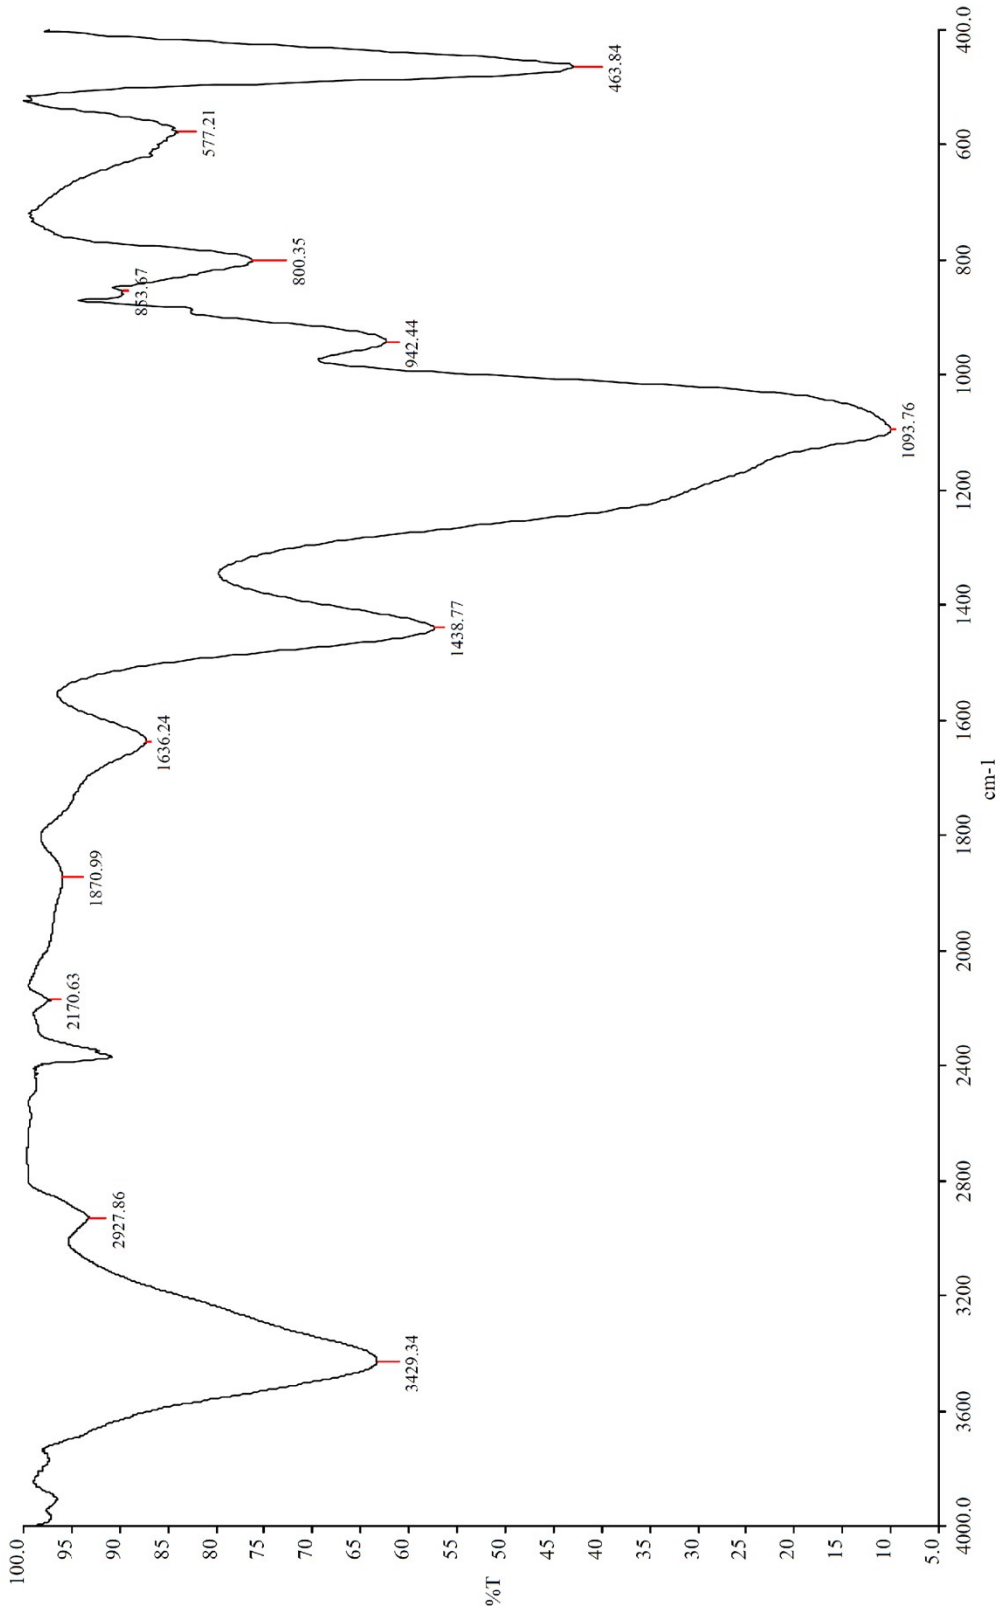

# FT-IR of MNPO

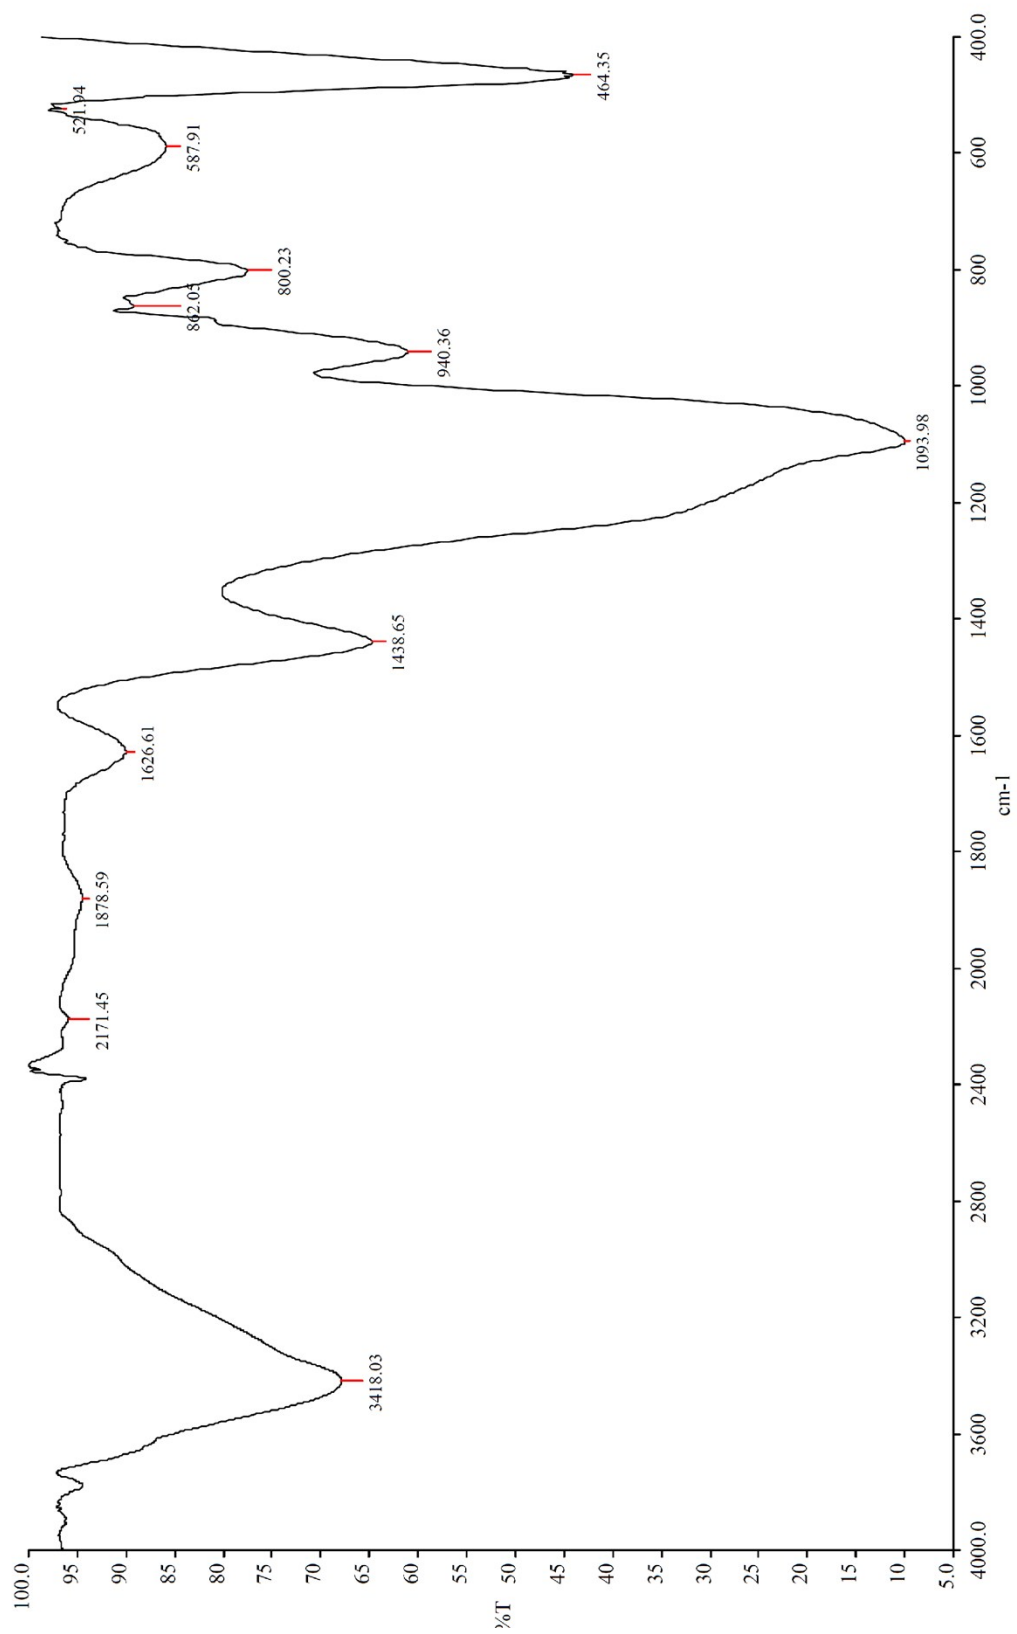

# FT-IR of MNP-SAA catalyst

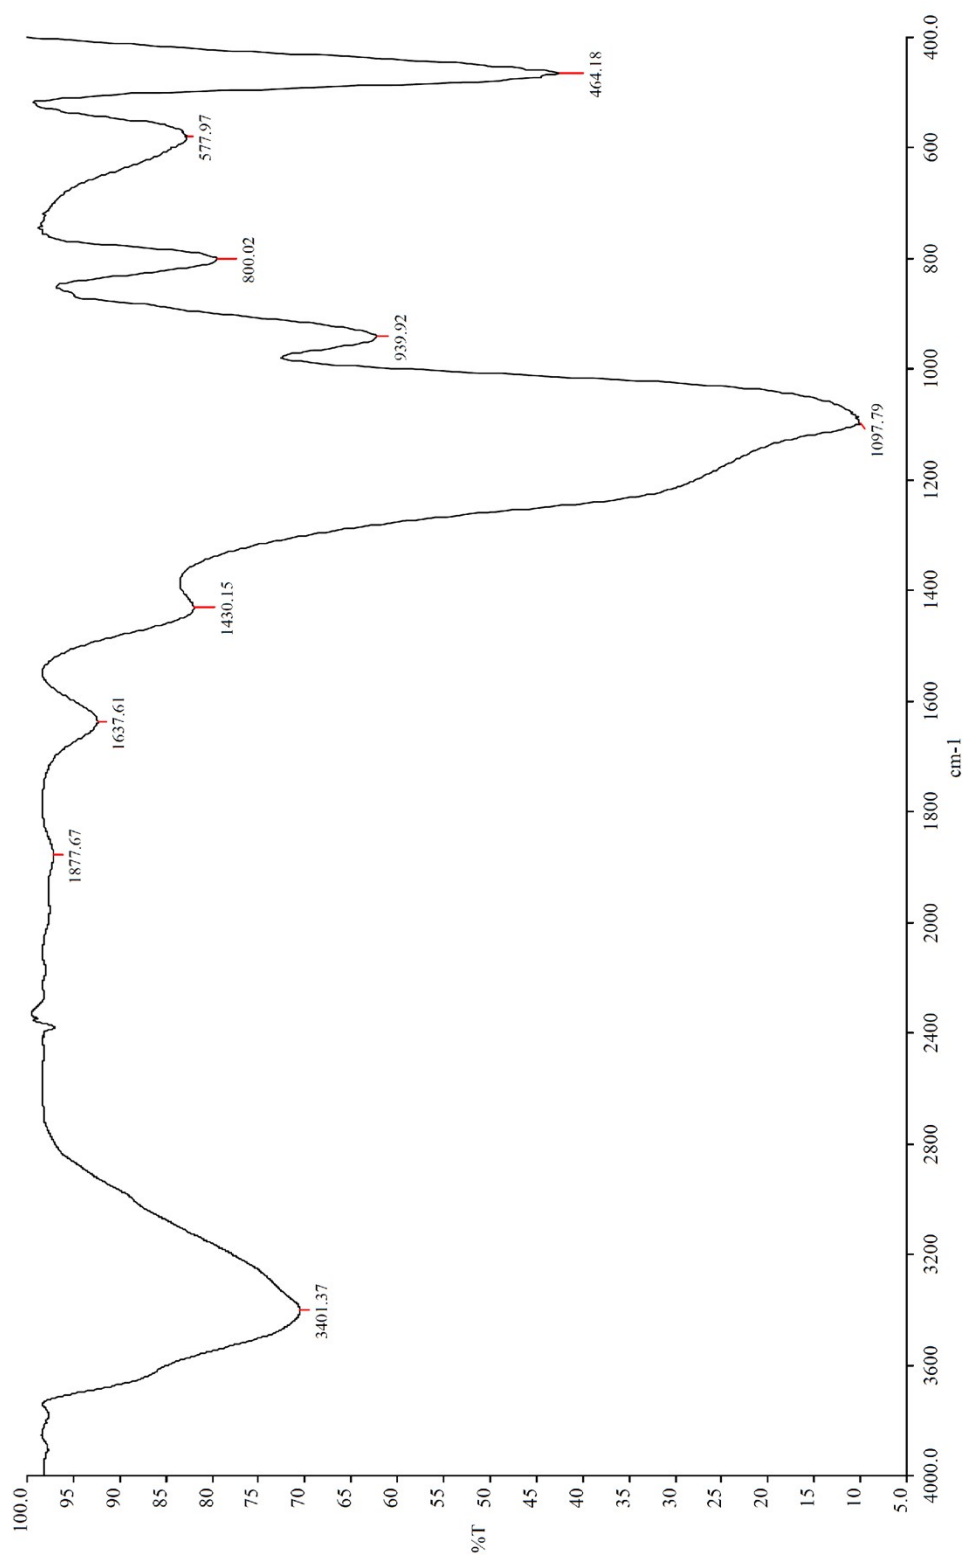

# FT-IR of Sulfanilic acid

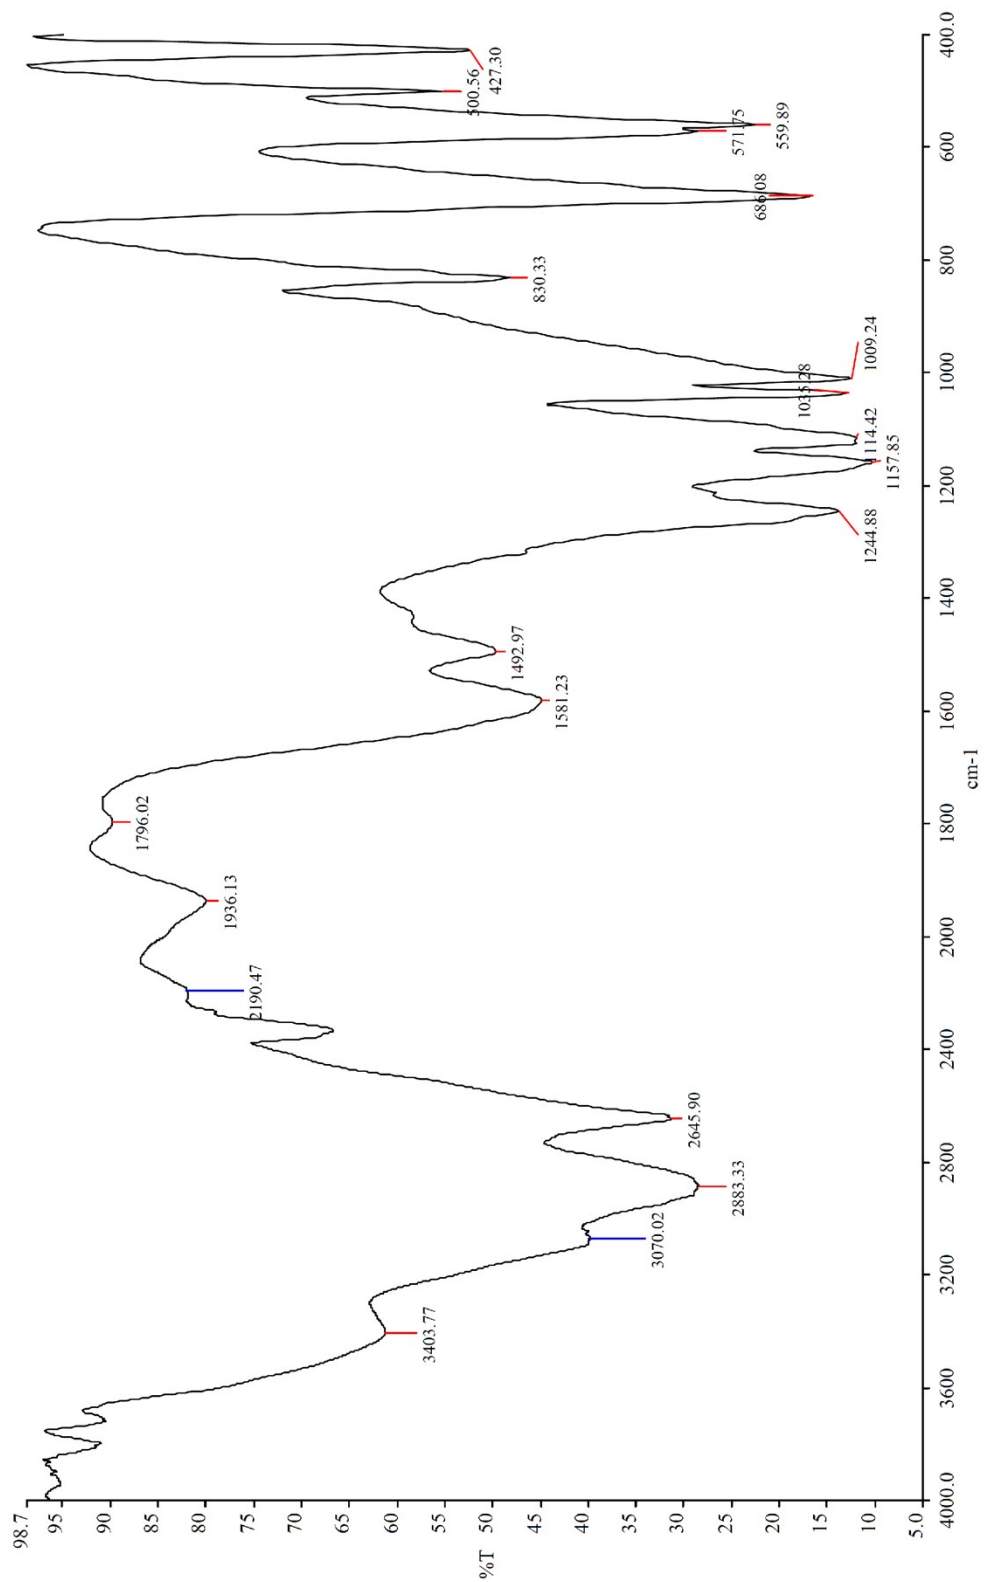

1.  $^1\text{H}$  NMR,  $^{13}\text{C}$  NMR & IR of Compound 4a

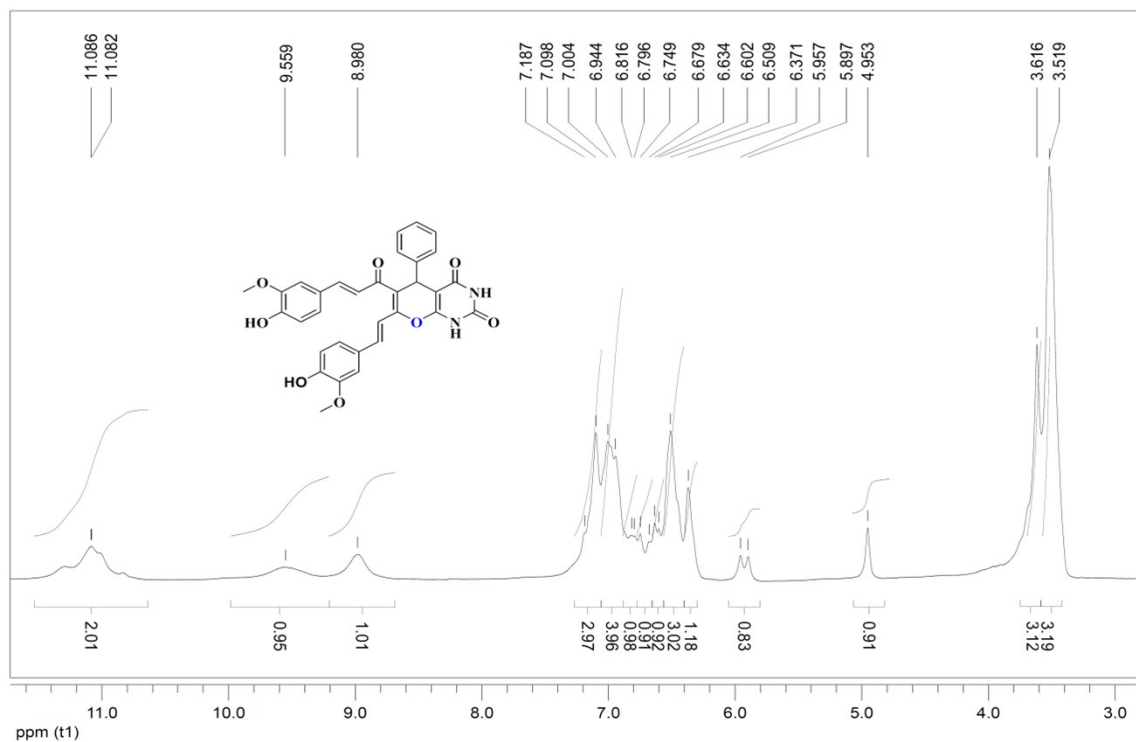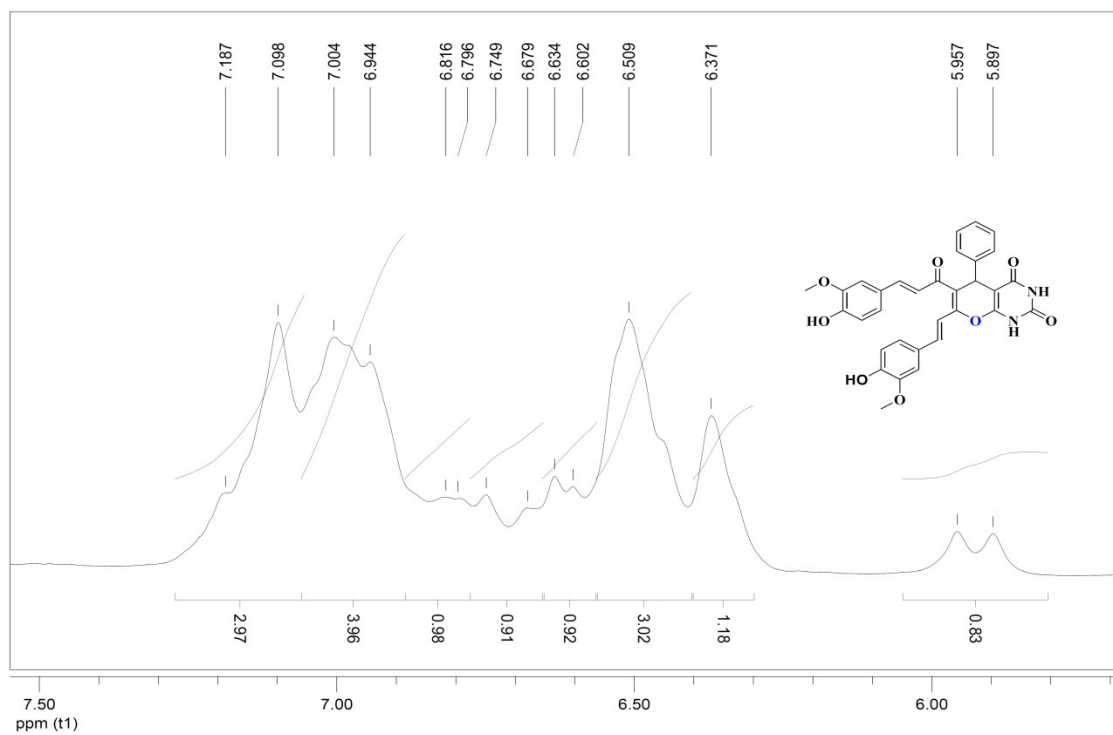



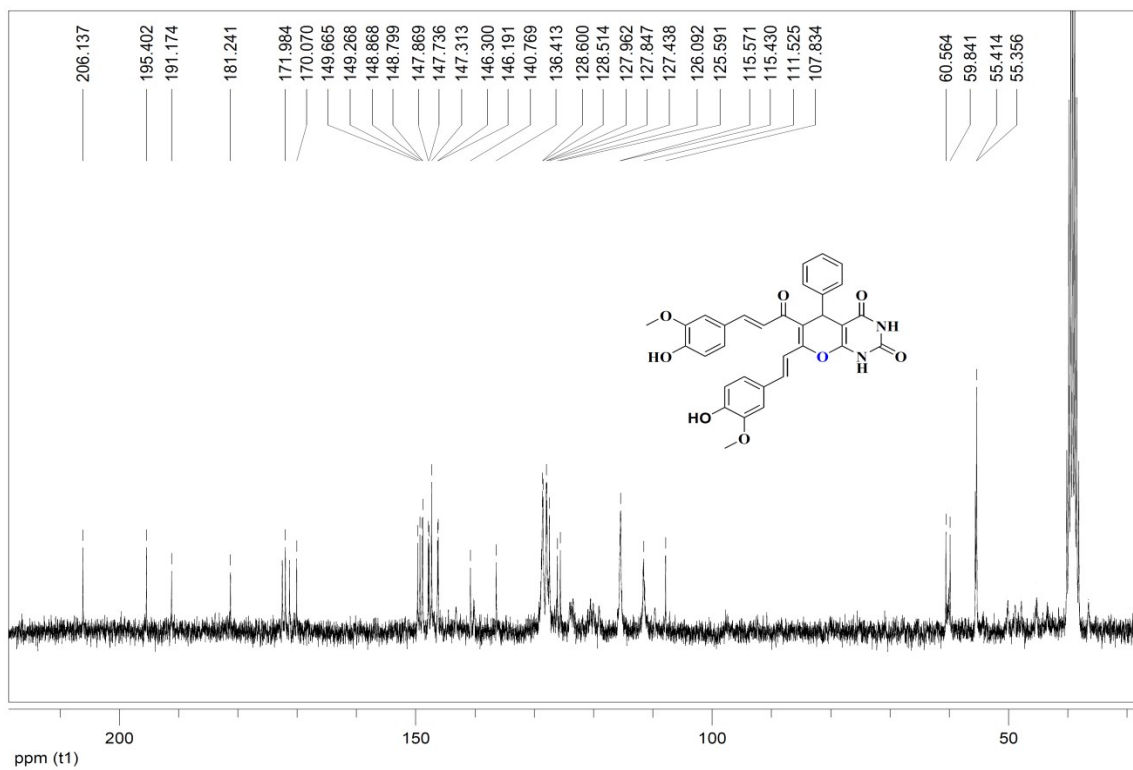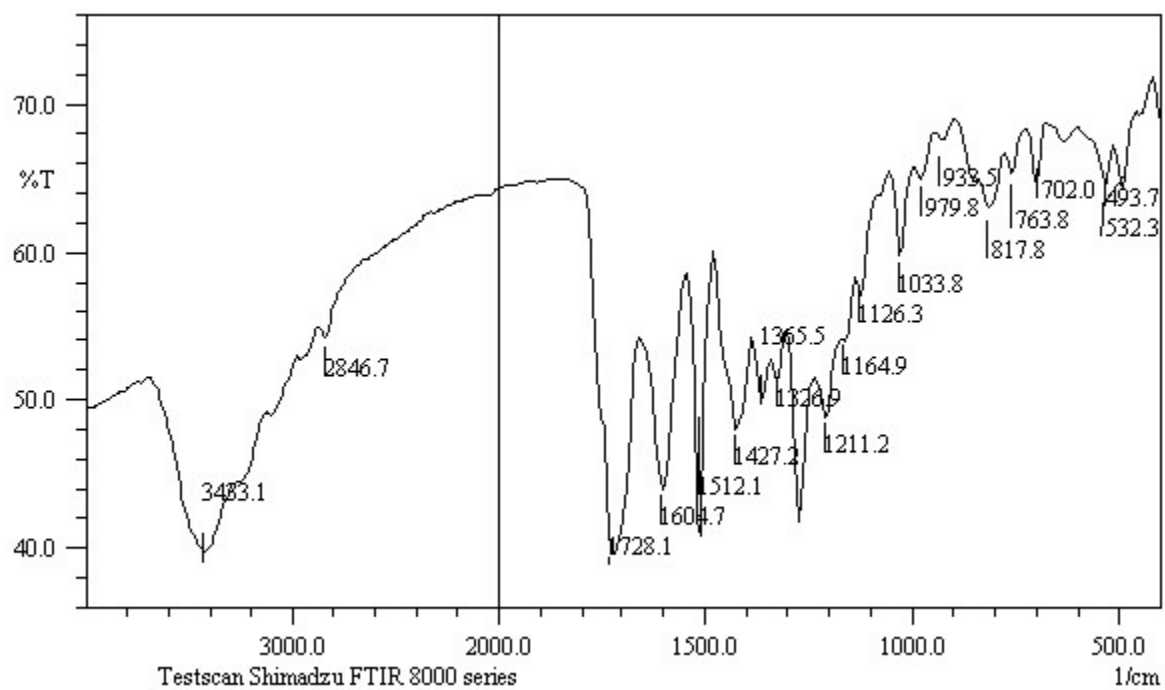

2.  $^1\text{H}$  NMR,  $^{13}\text{C}$  NMR & IR of Compound **4b**

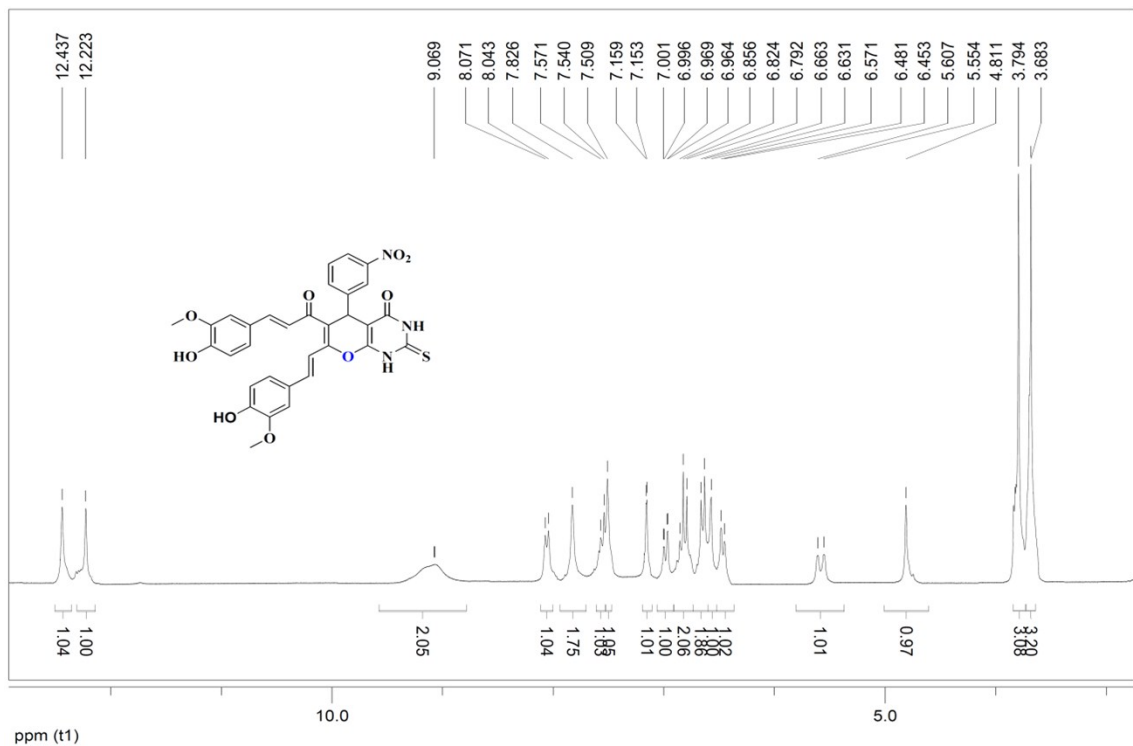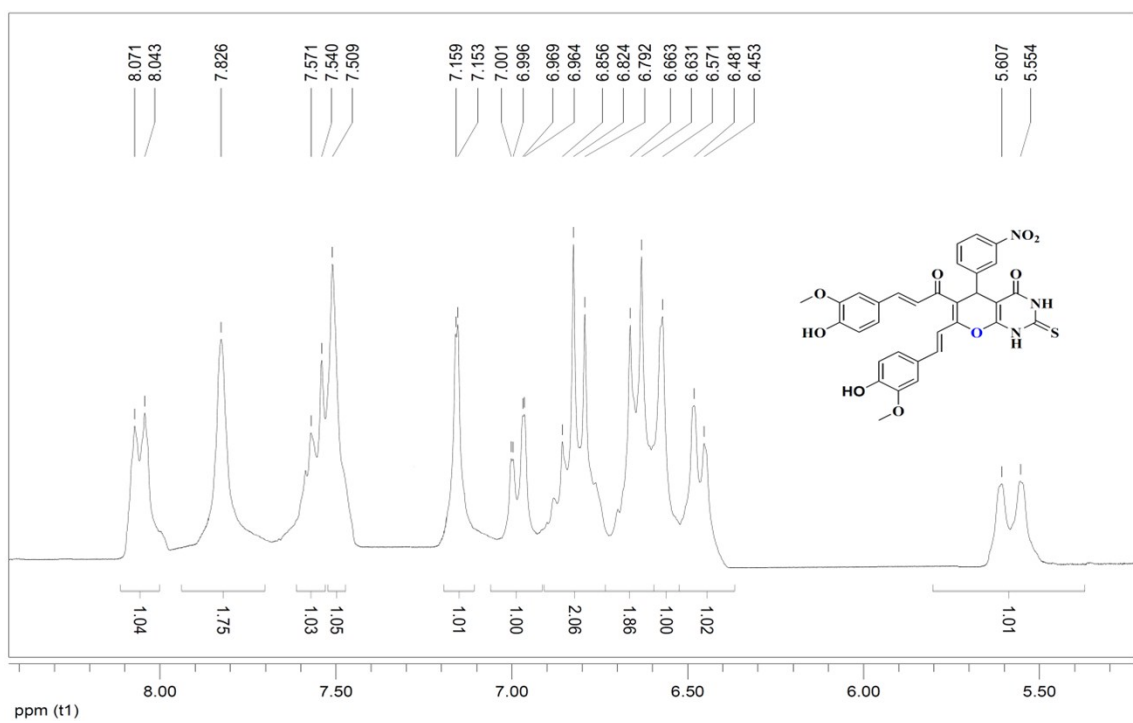

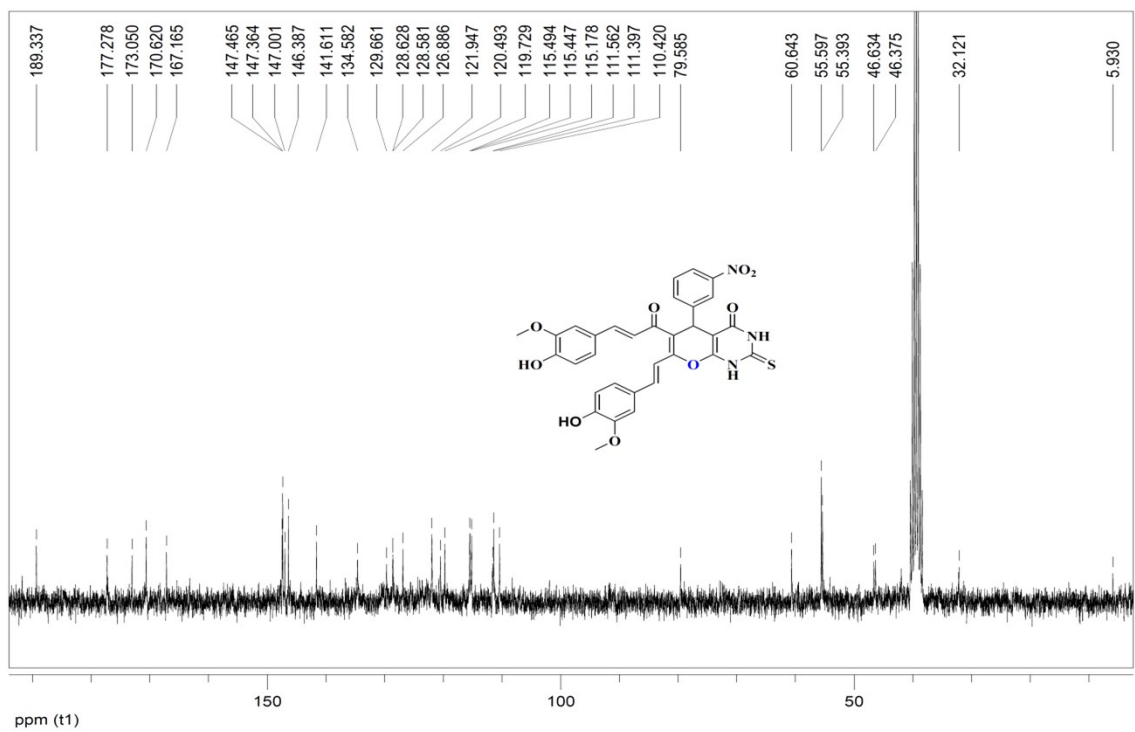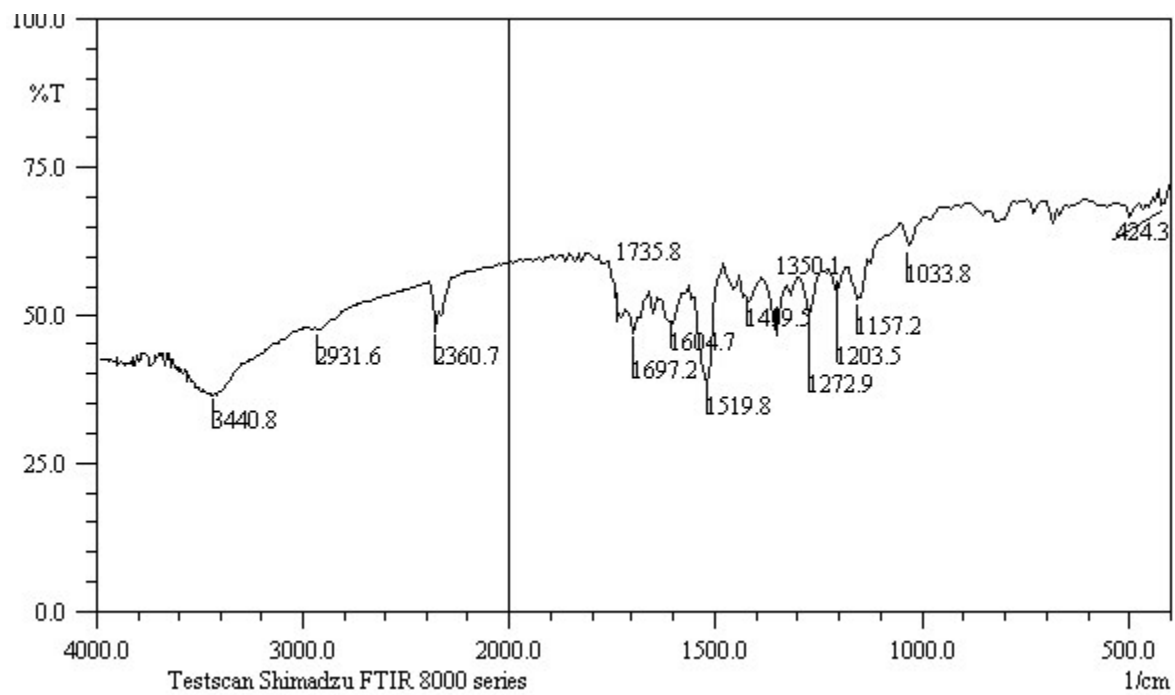

3.  $^1\text{H}$  NMR,  $^{13}\text{C}$  NMR & IR of Compound 4e

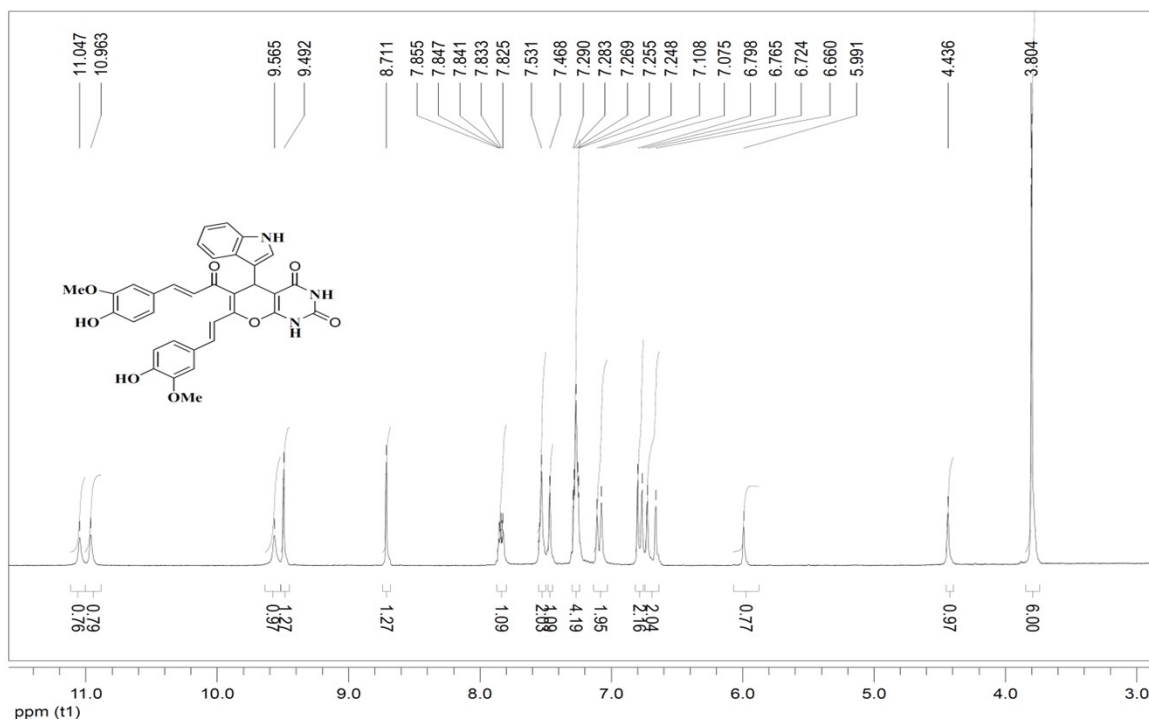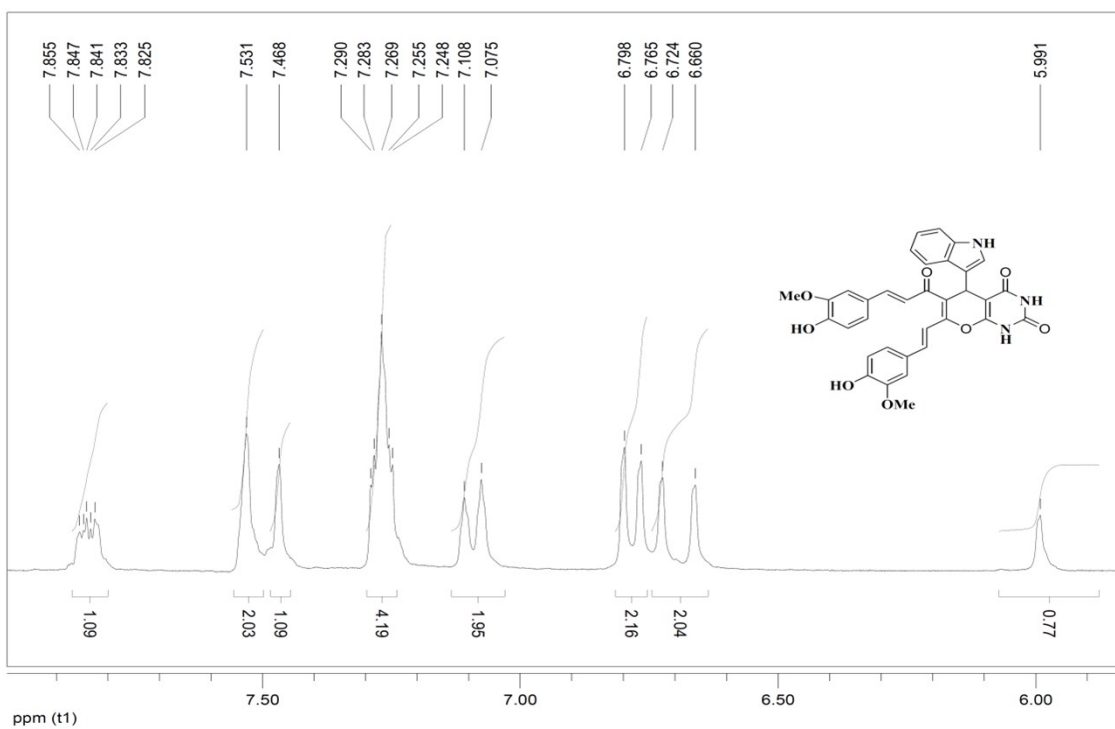

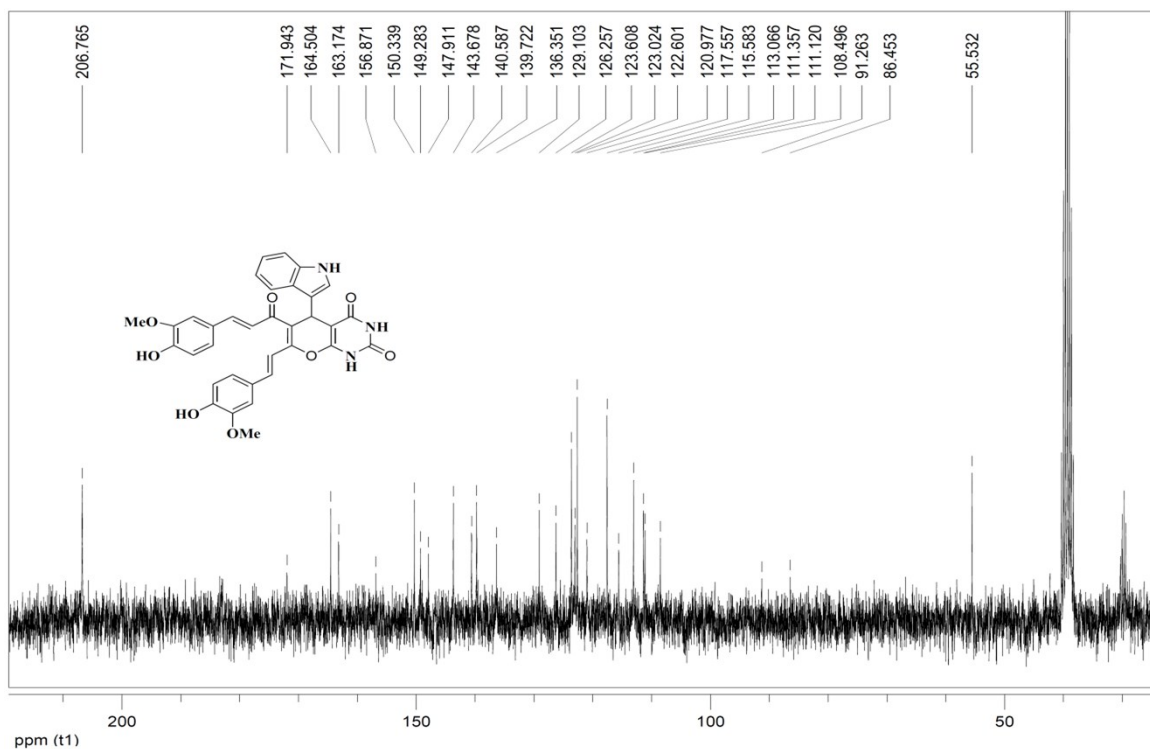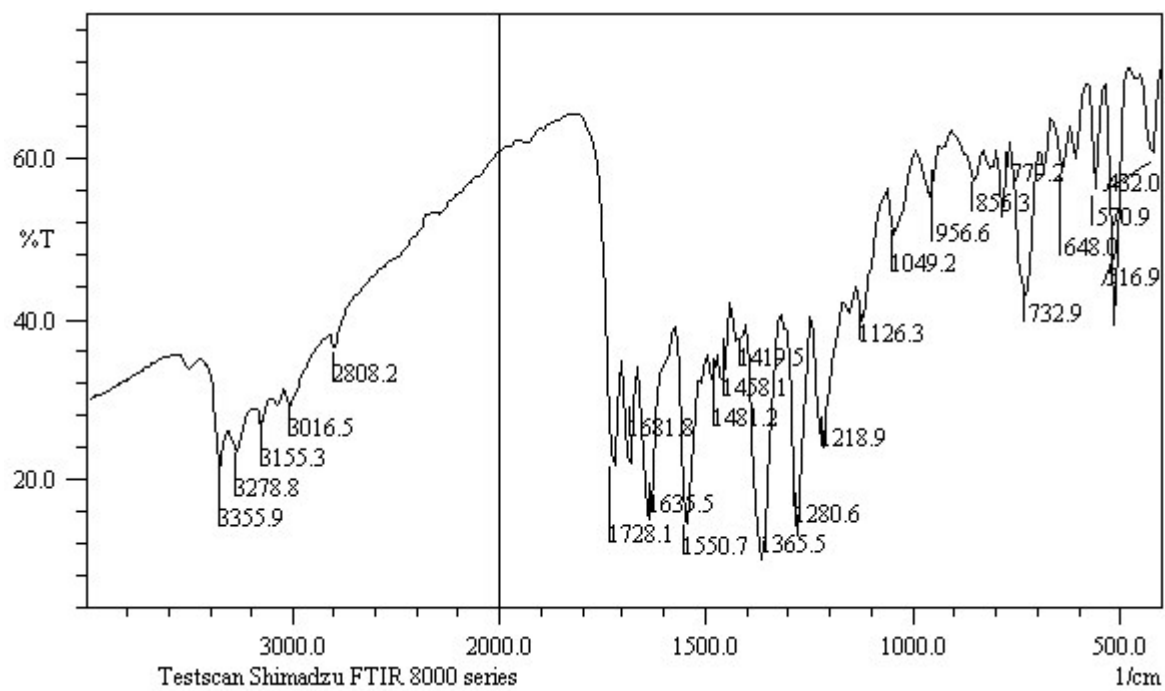

4.  $^1\text{H}$  NMR,  $^{13}\text{C}$  NMR & IR of Compound 4d

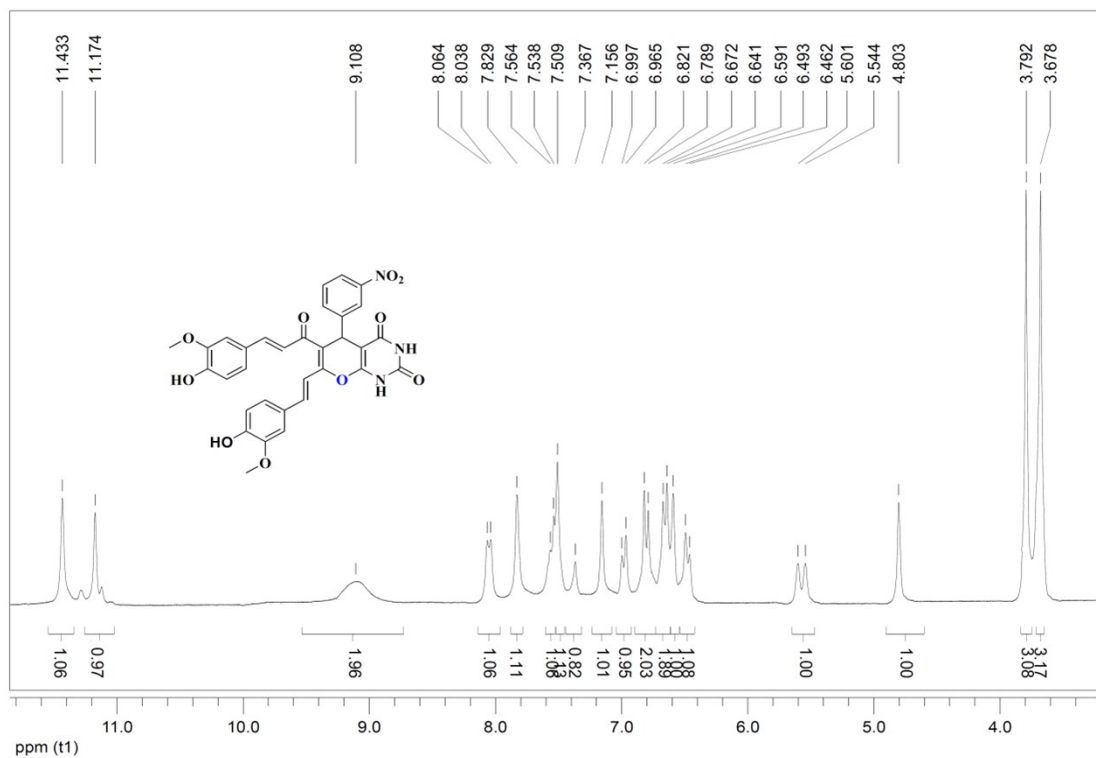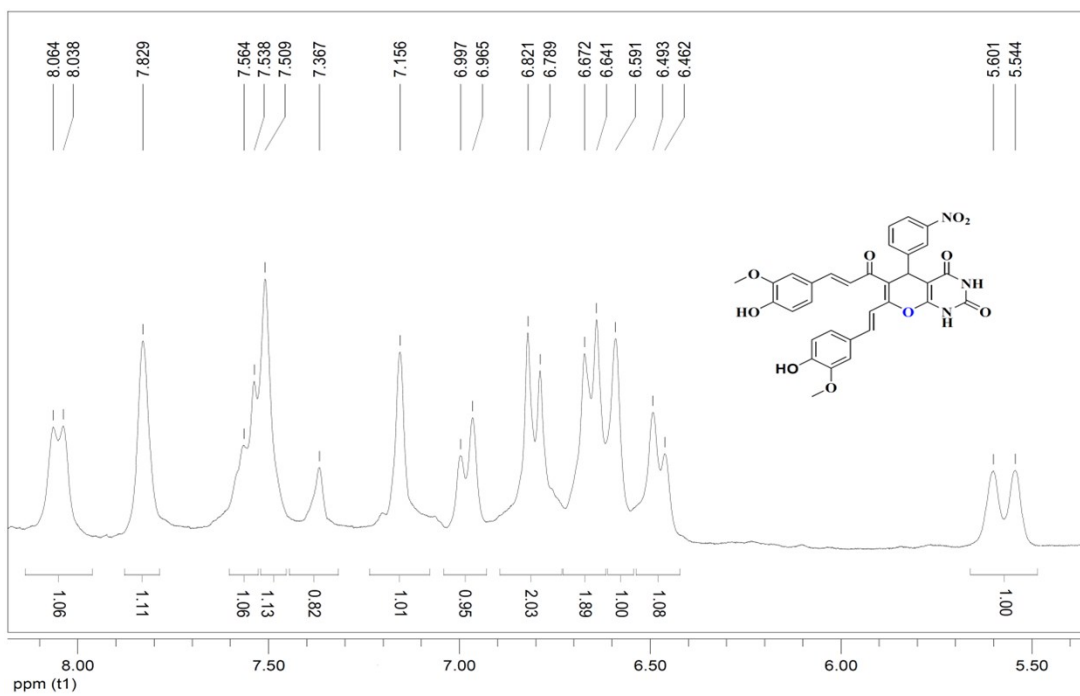

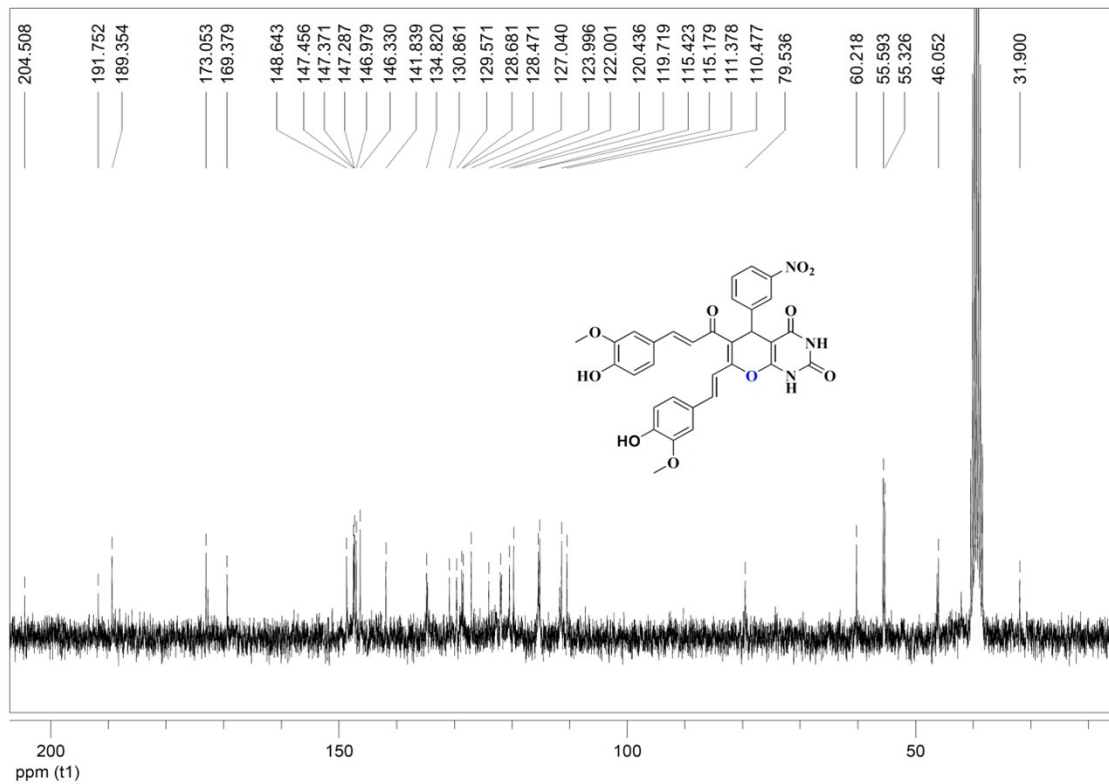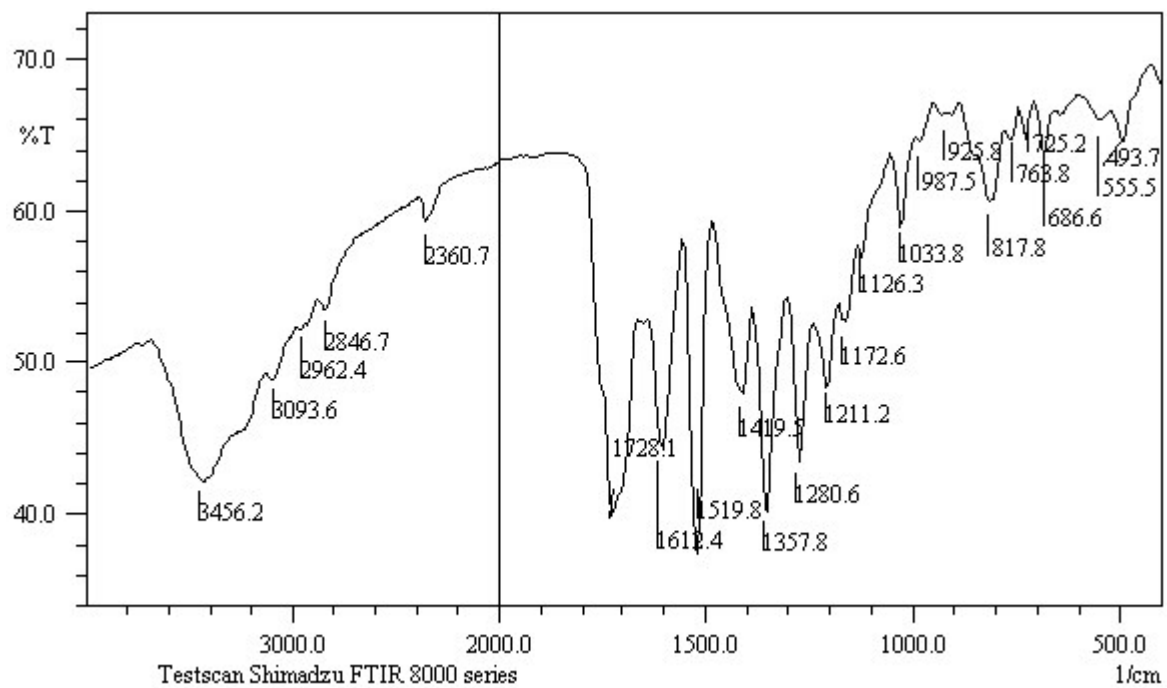

5.  $^1\text{H}$  NMR,  $^{13}\text{C}$  NMR & IR of Compound 4e

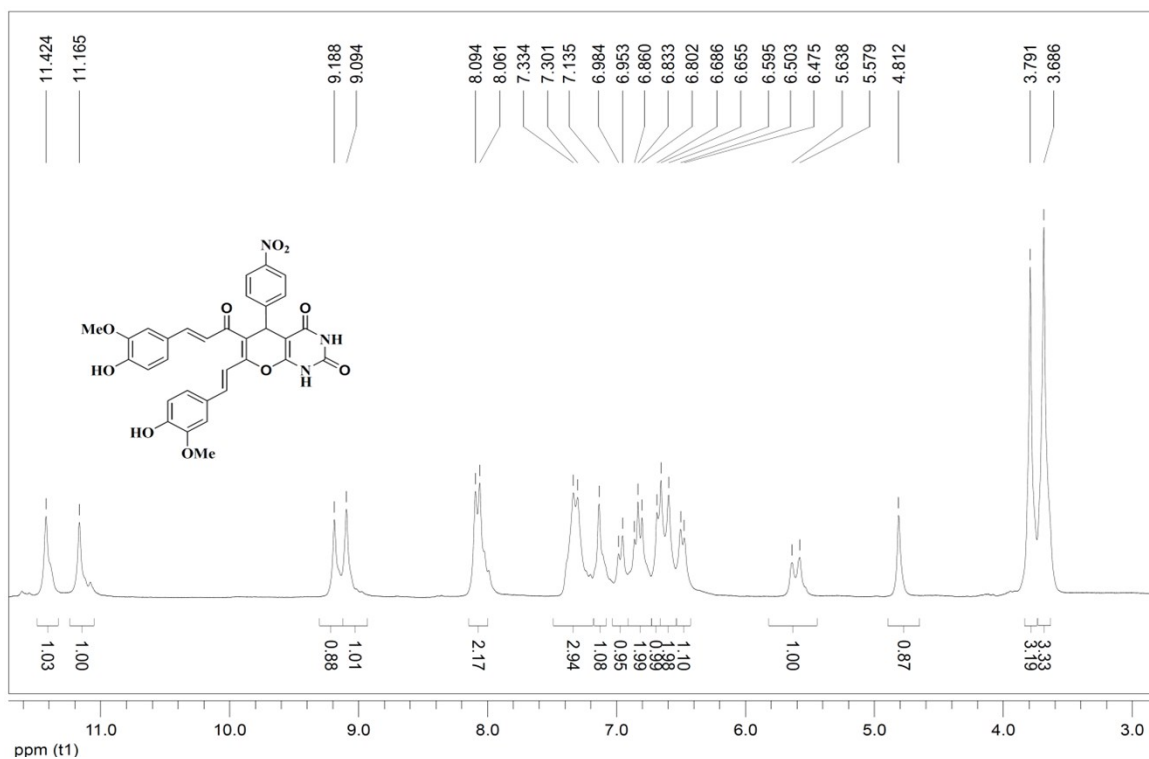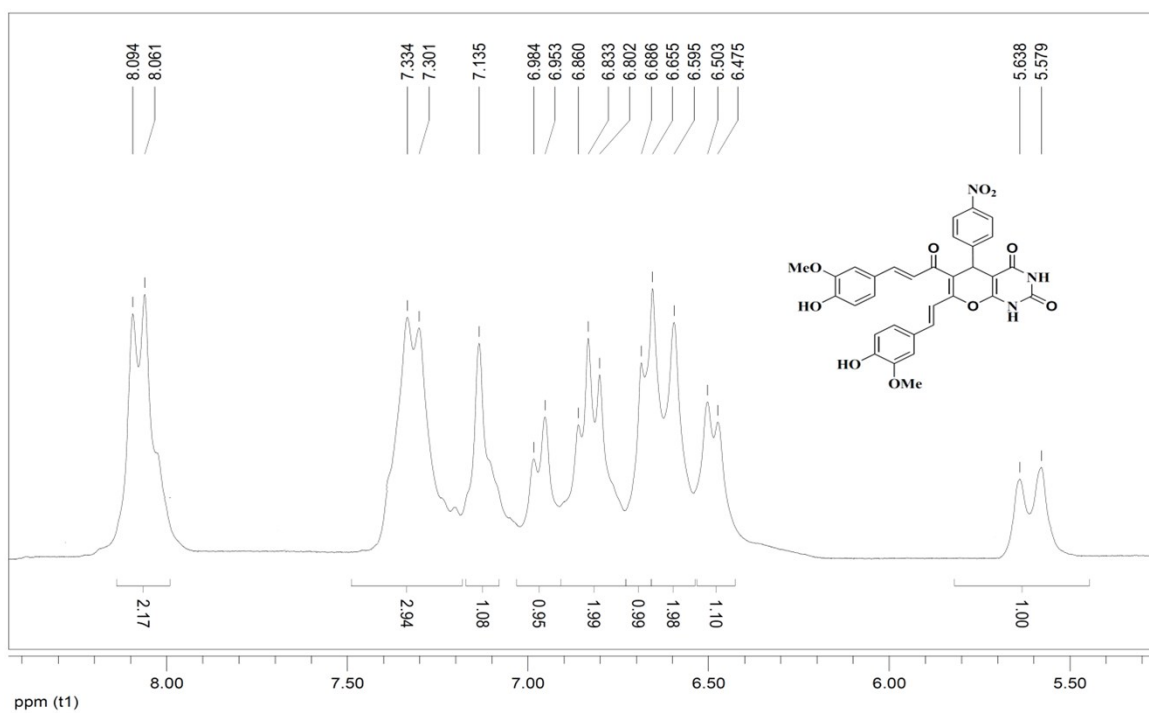



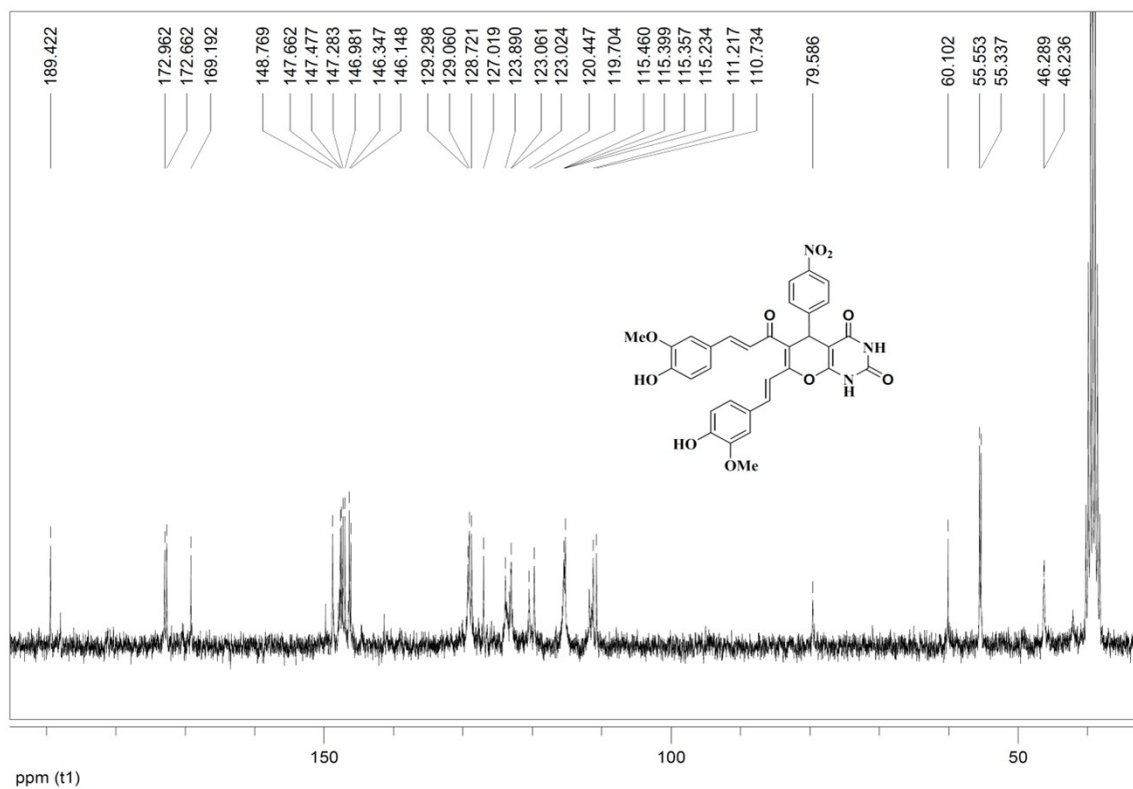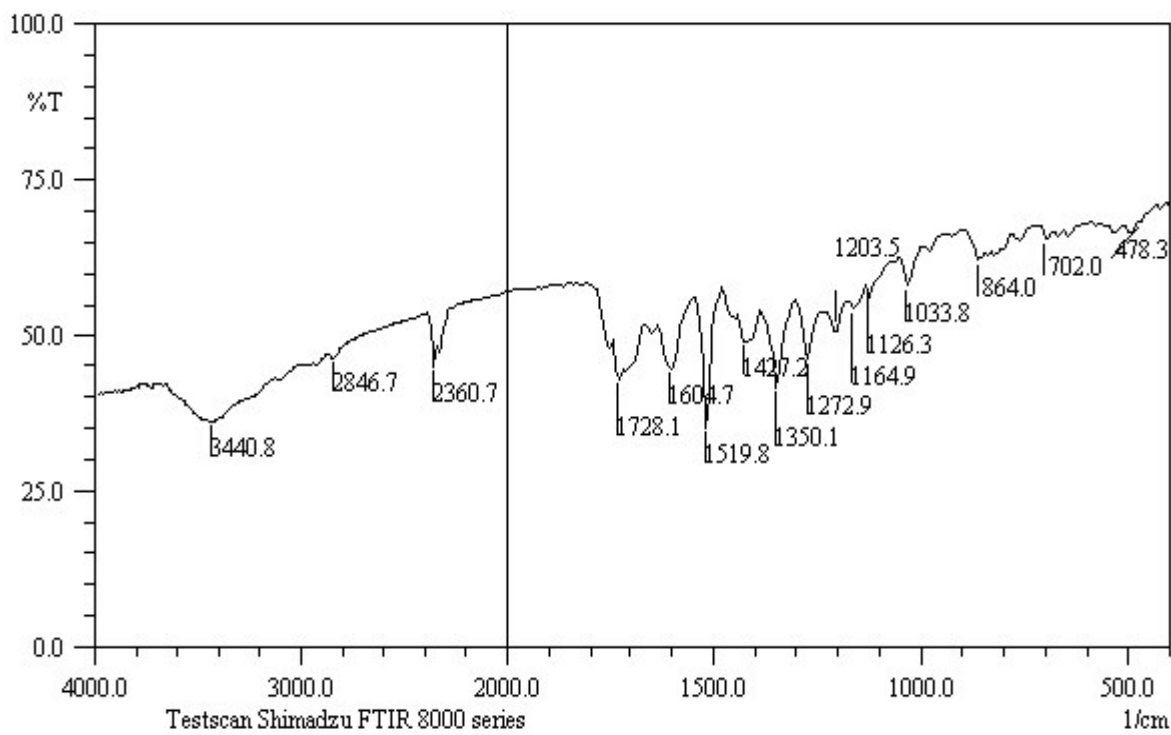

6.  $^1\text{H}$  NMR,  $^{13}\text{C}$  NMR & IR of Compound **4f**

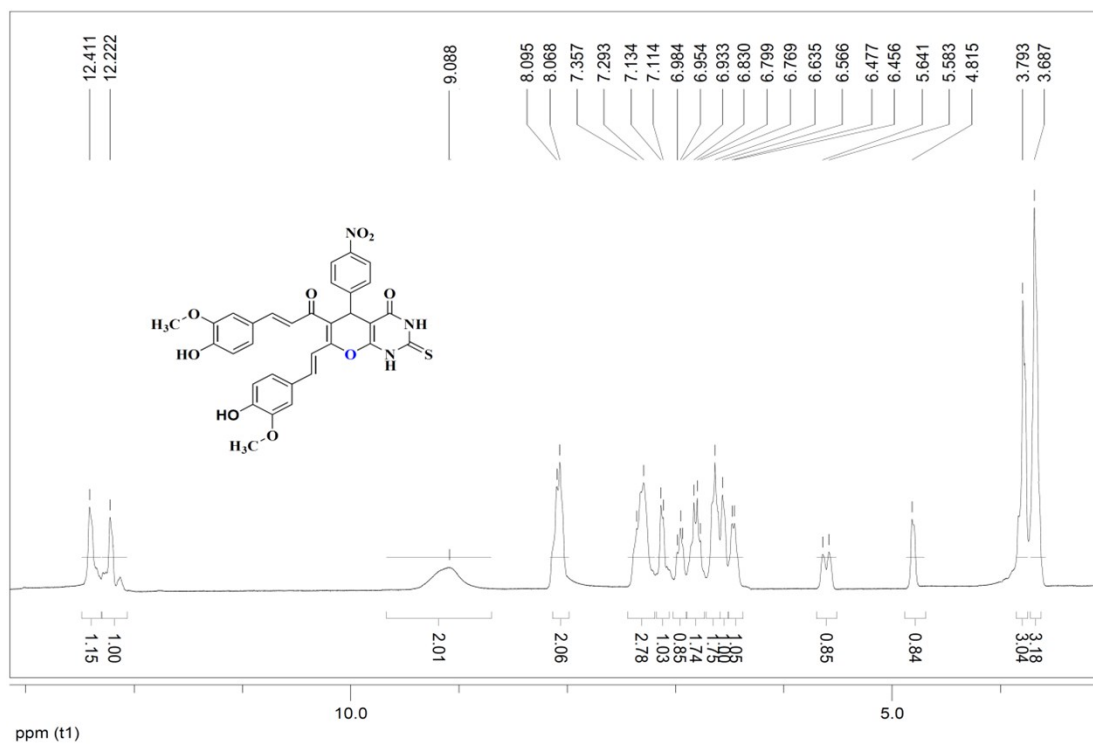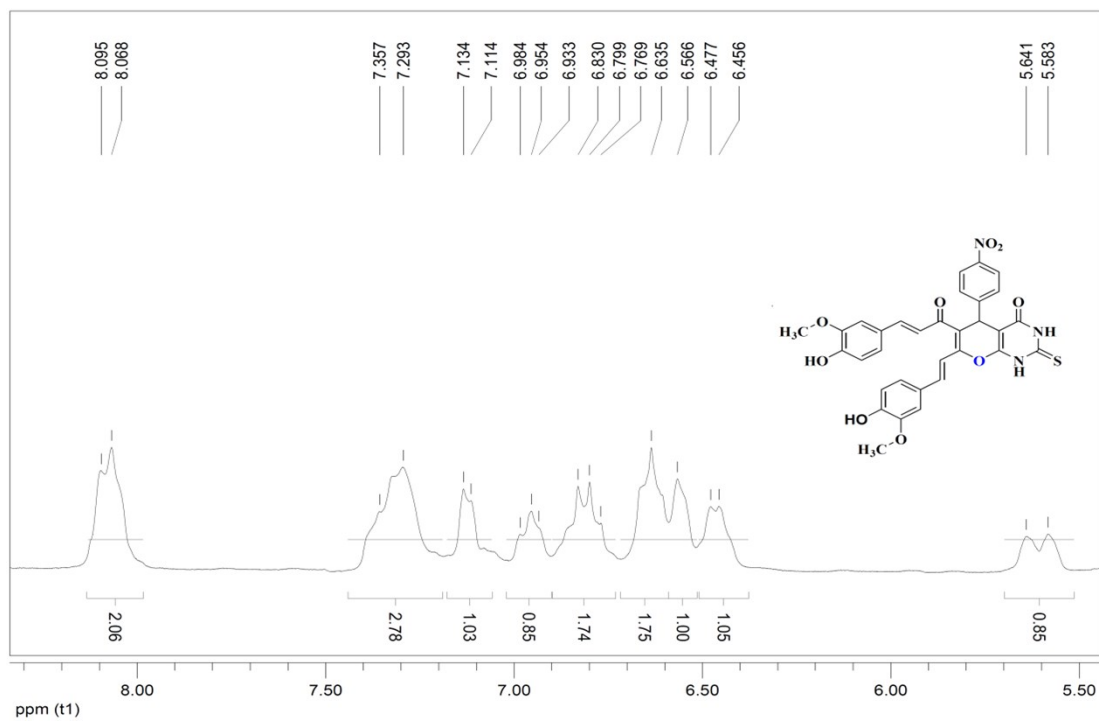

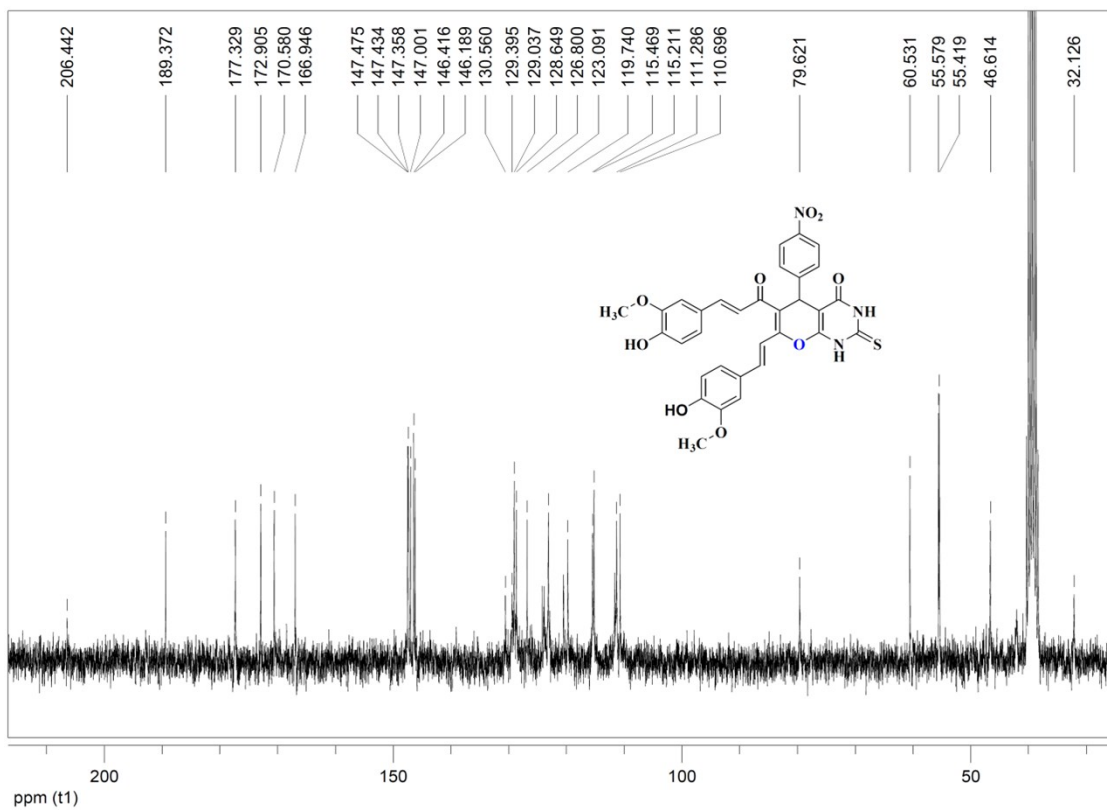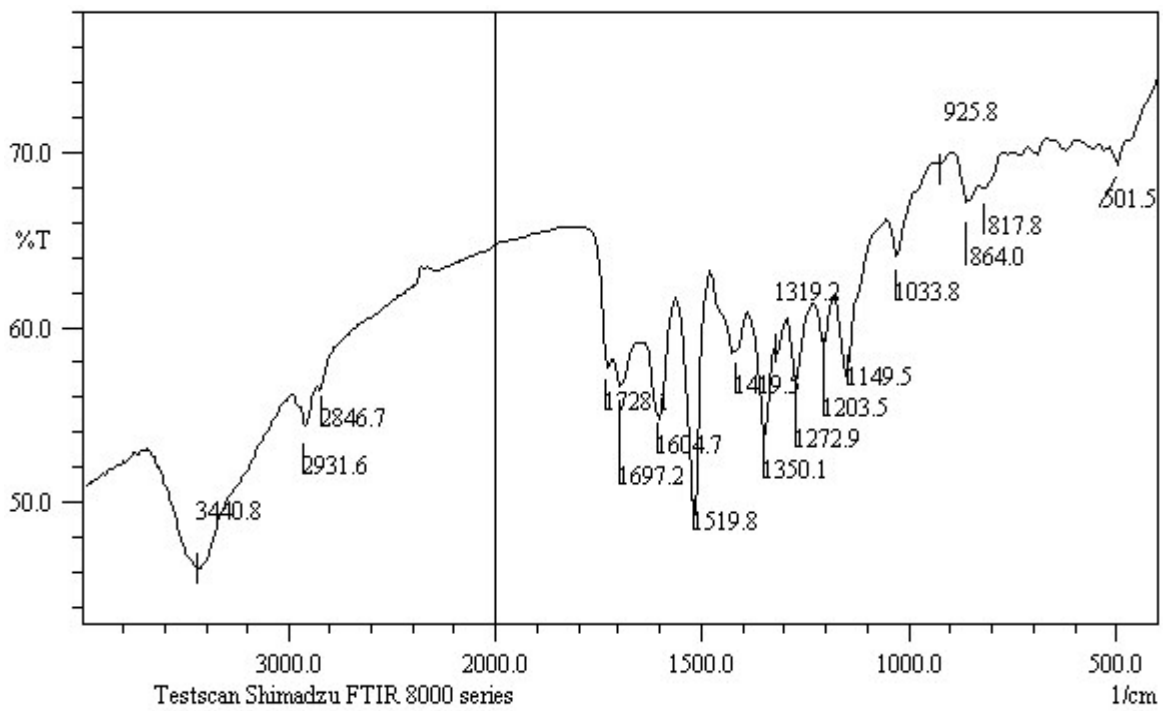

### 7. <sup>1</sup>H NMR, <sup>13</sup>C NMR & IR of Compound 4g

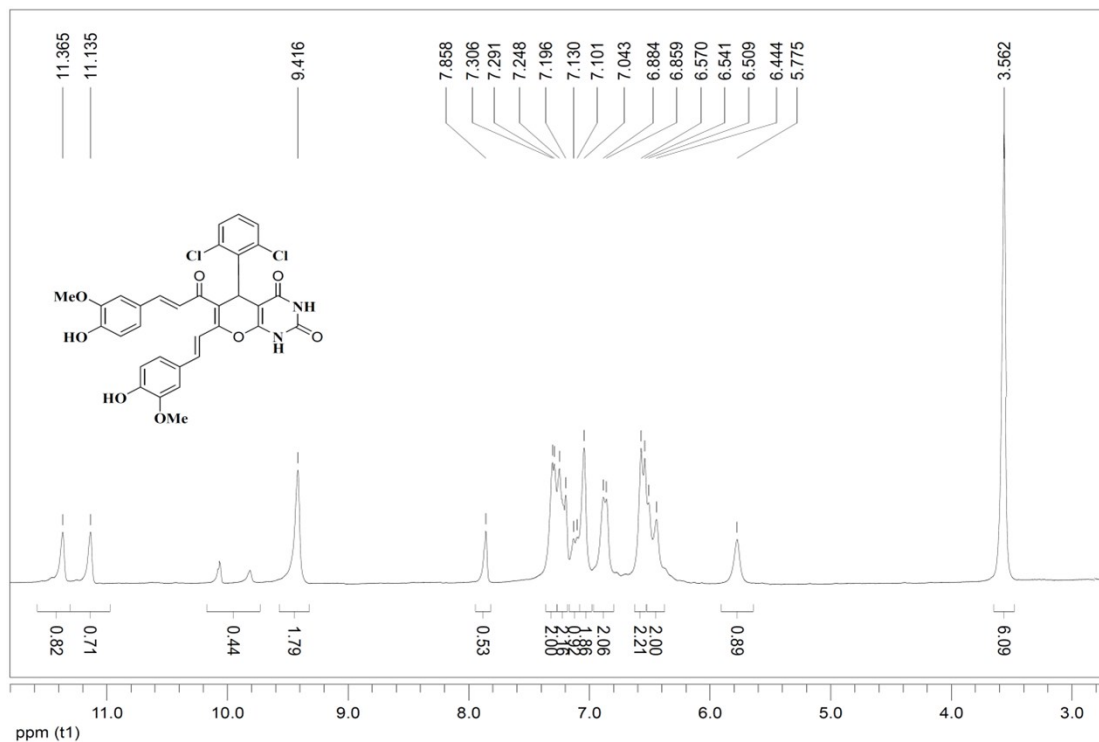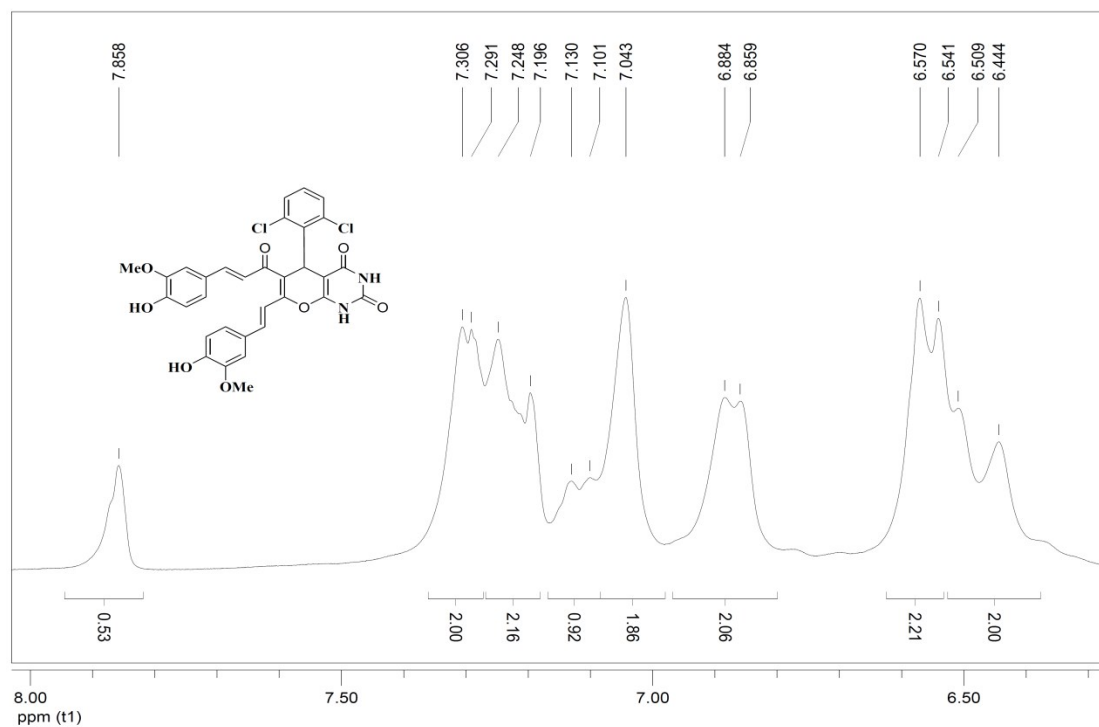

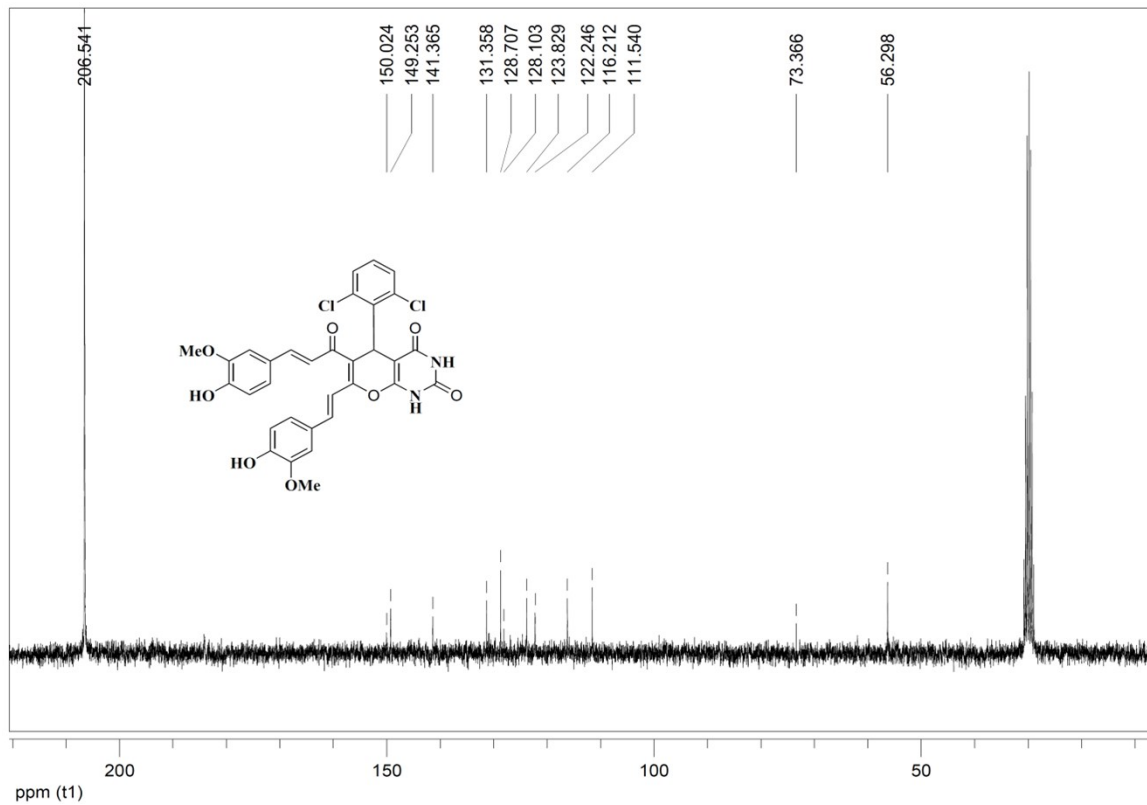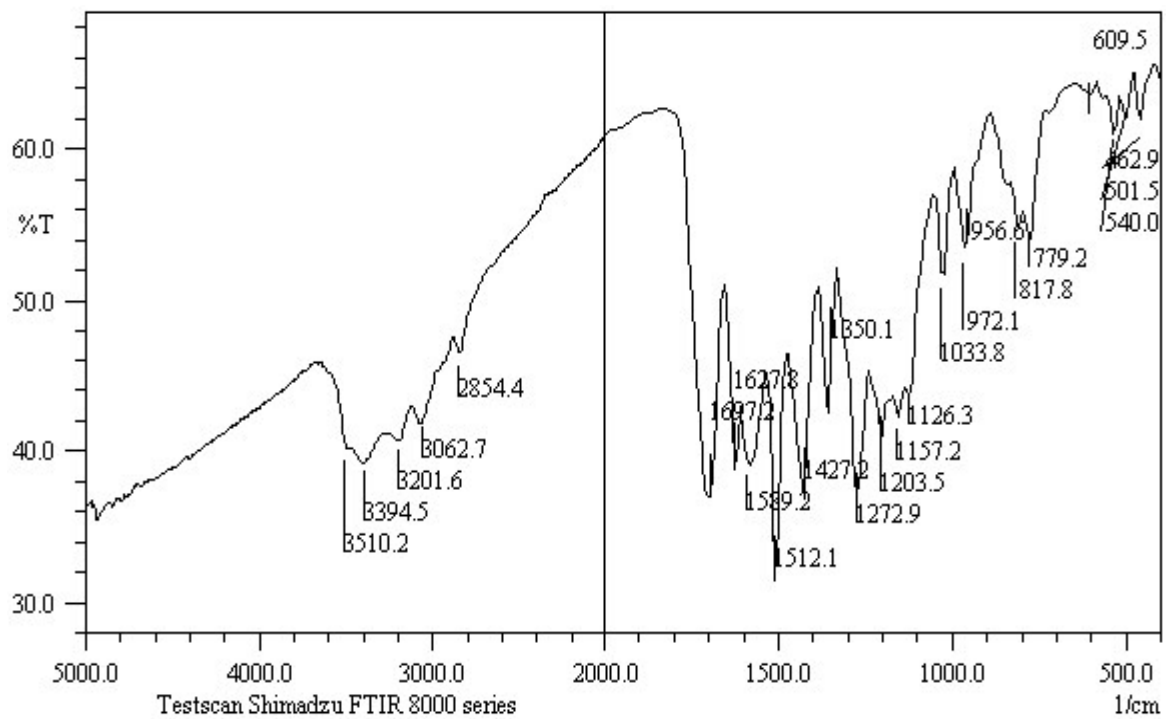

8.  $^1\text{H}$  NMR,  $^{13}\text{C}$  NMR & IR of Compound **4h**

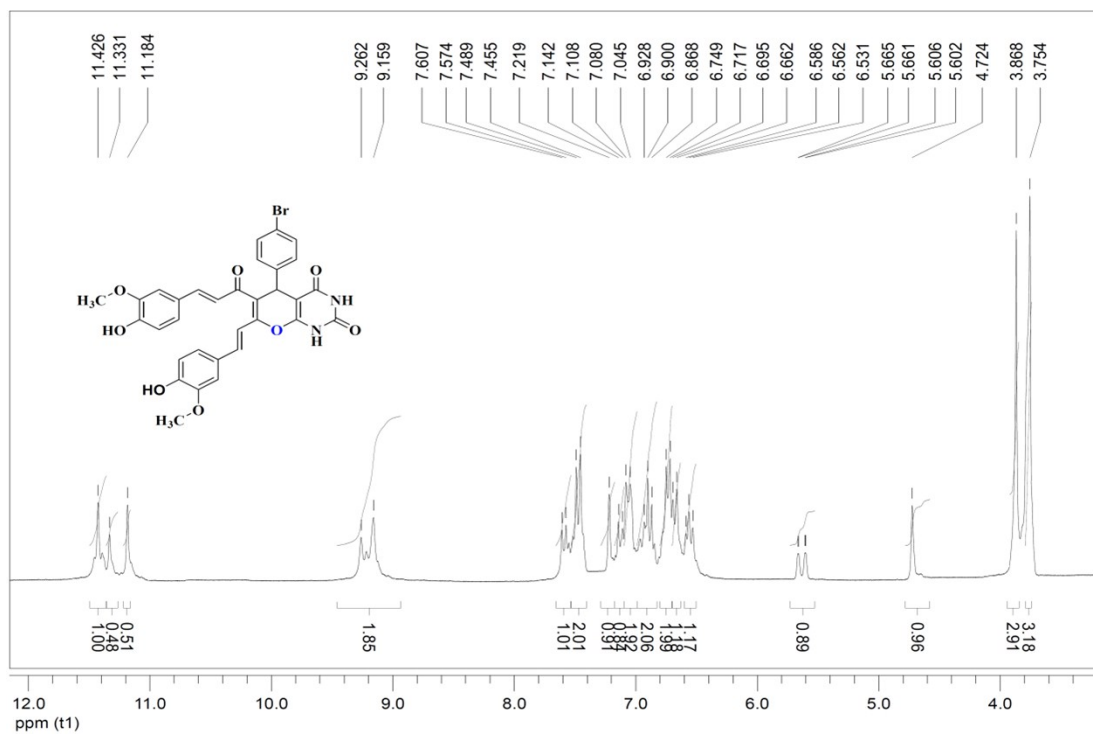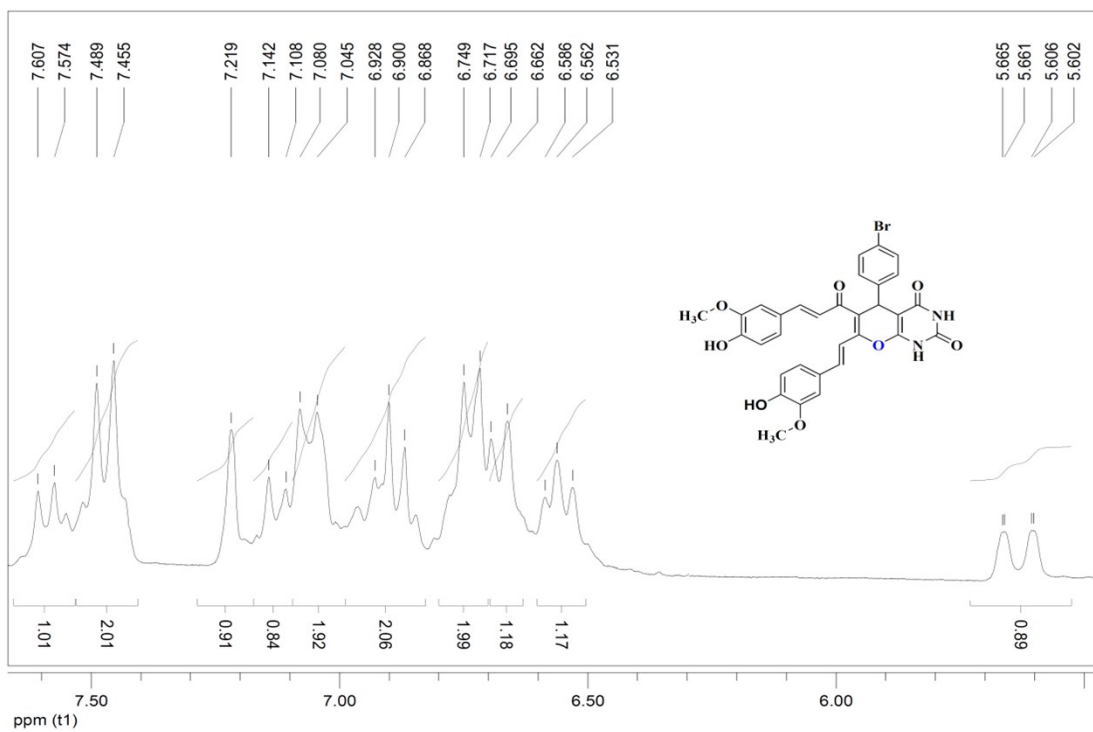

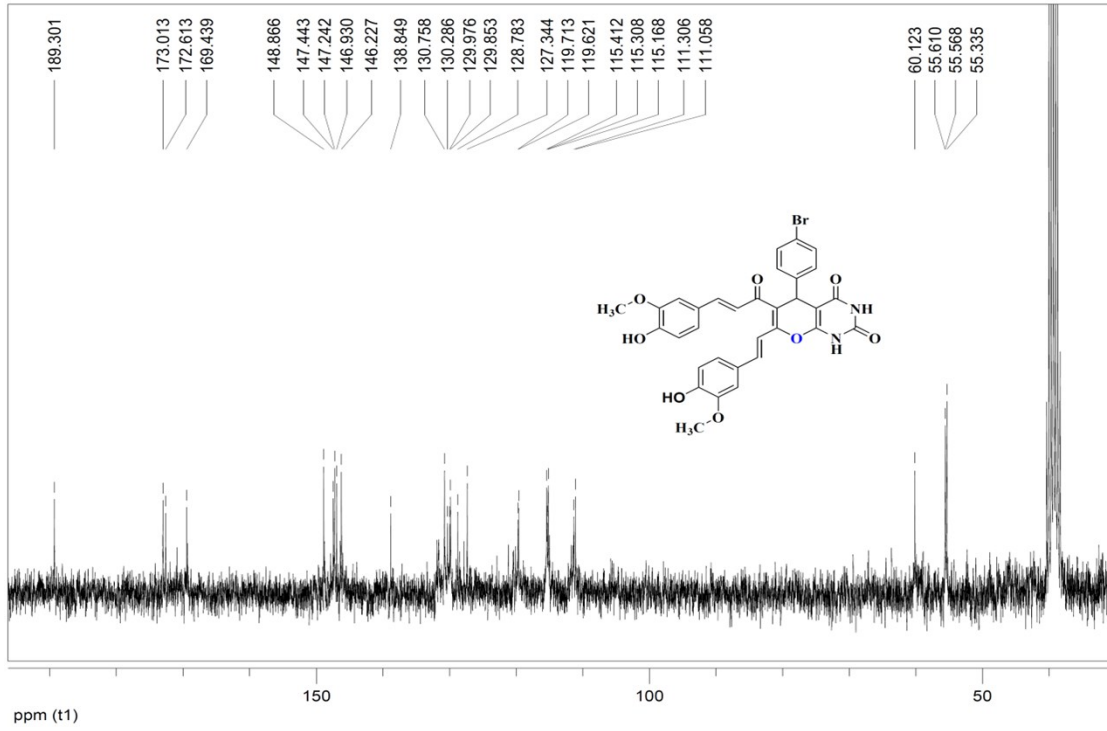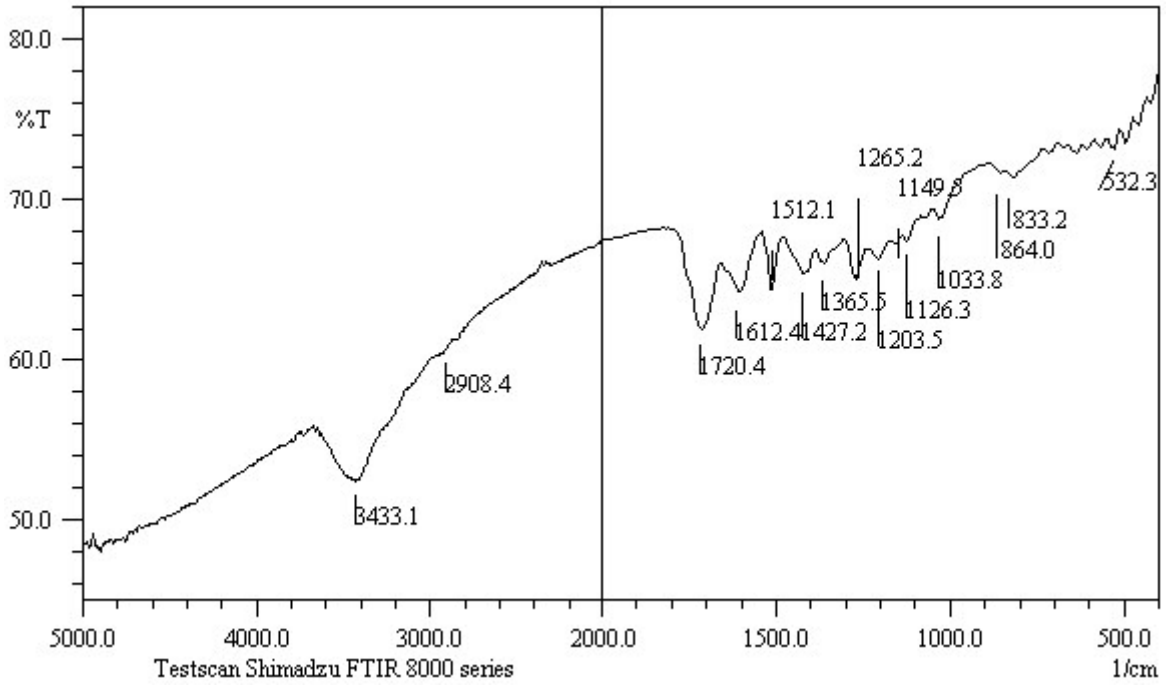

9.  $^1\text{H}$  NMR,  $^{13}\text{C}$  NMR & IR of Compound **4i**

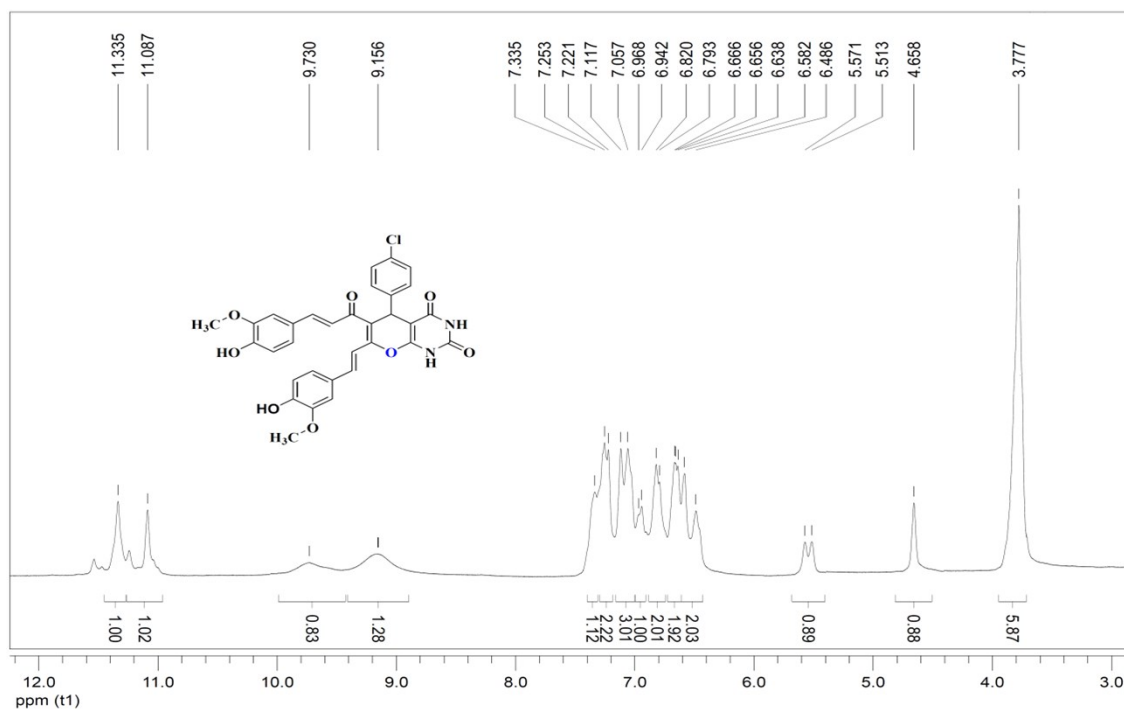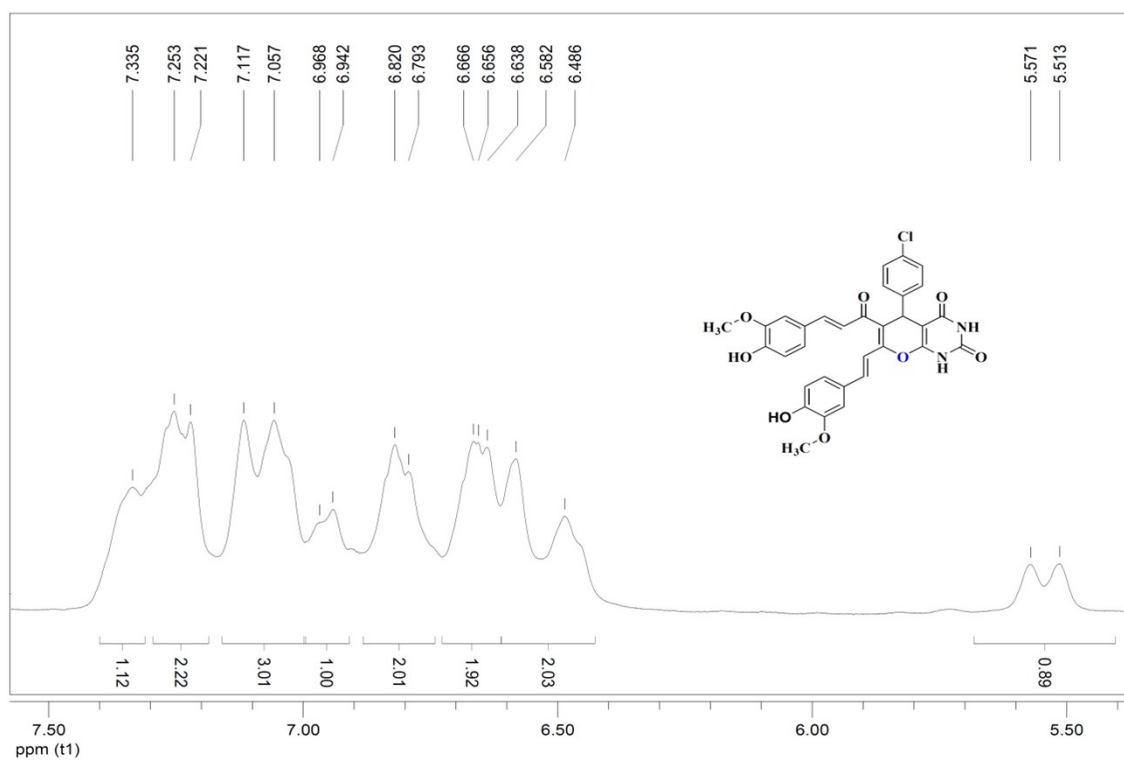



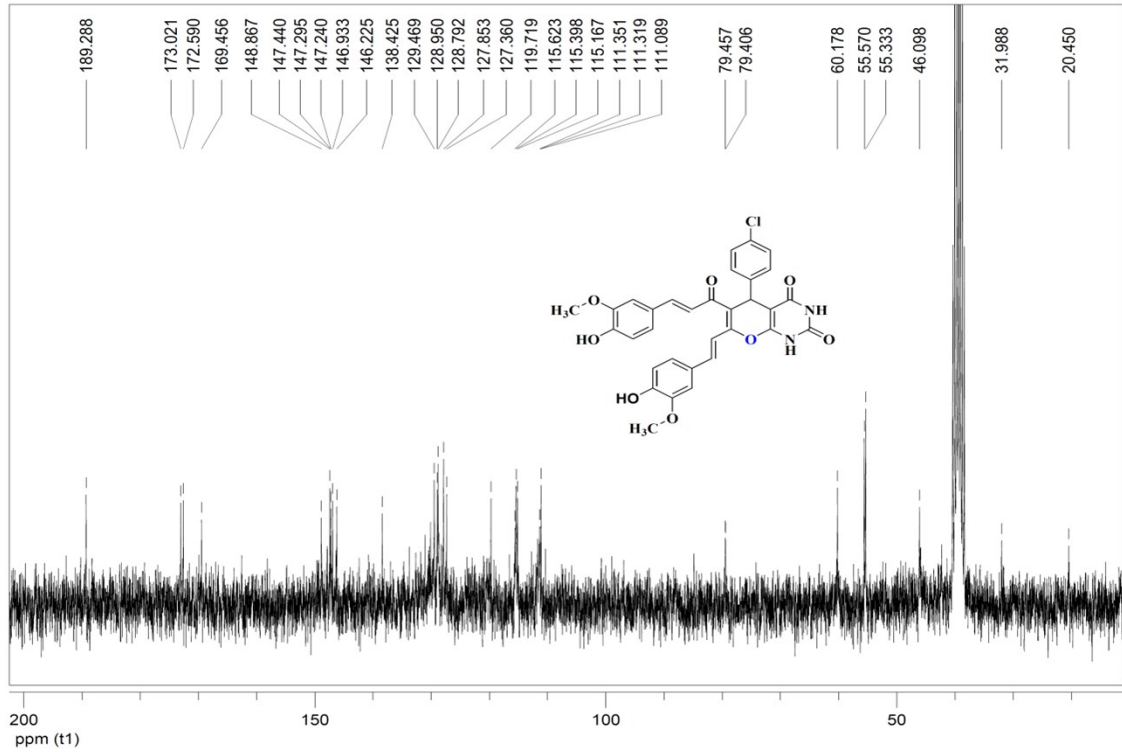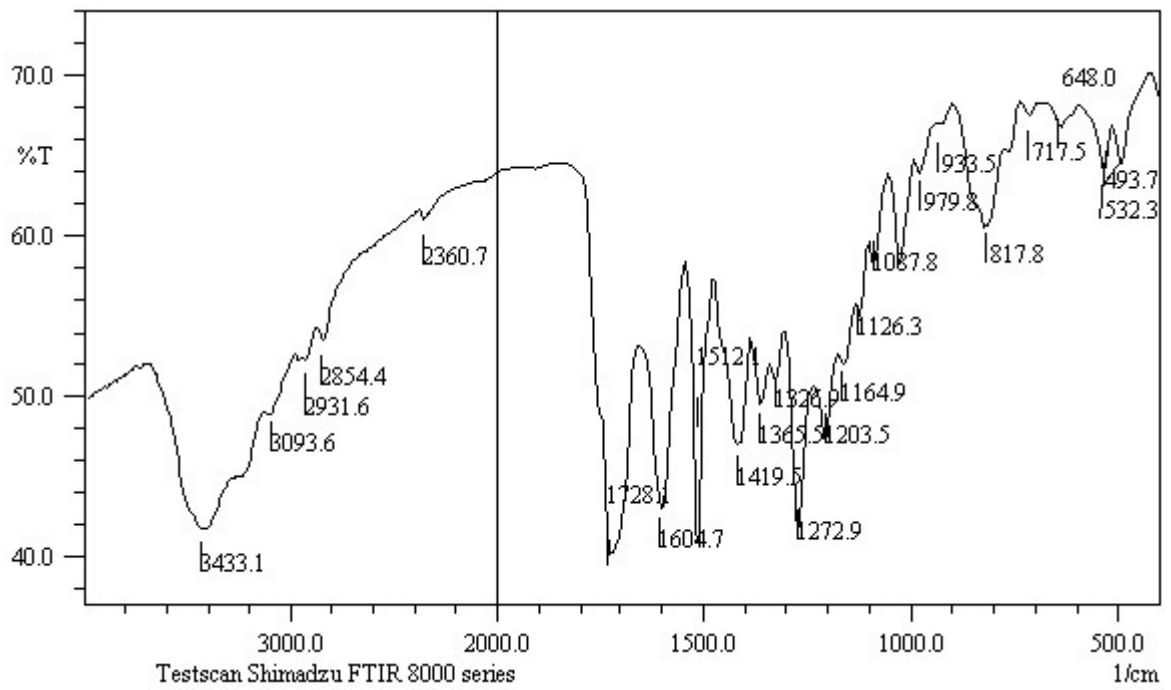

10.  $^1\text{H}$  NMR,  $^{13}\text{C}$  NMR & IR of Compound **4j**

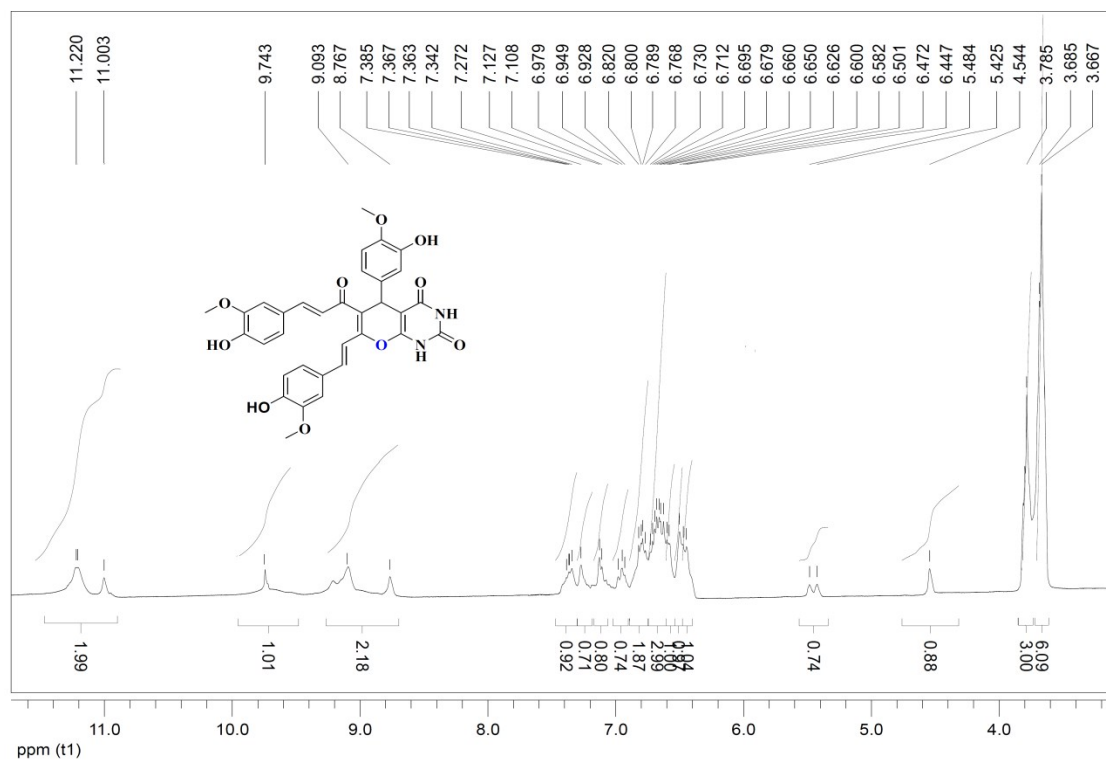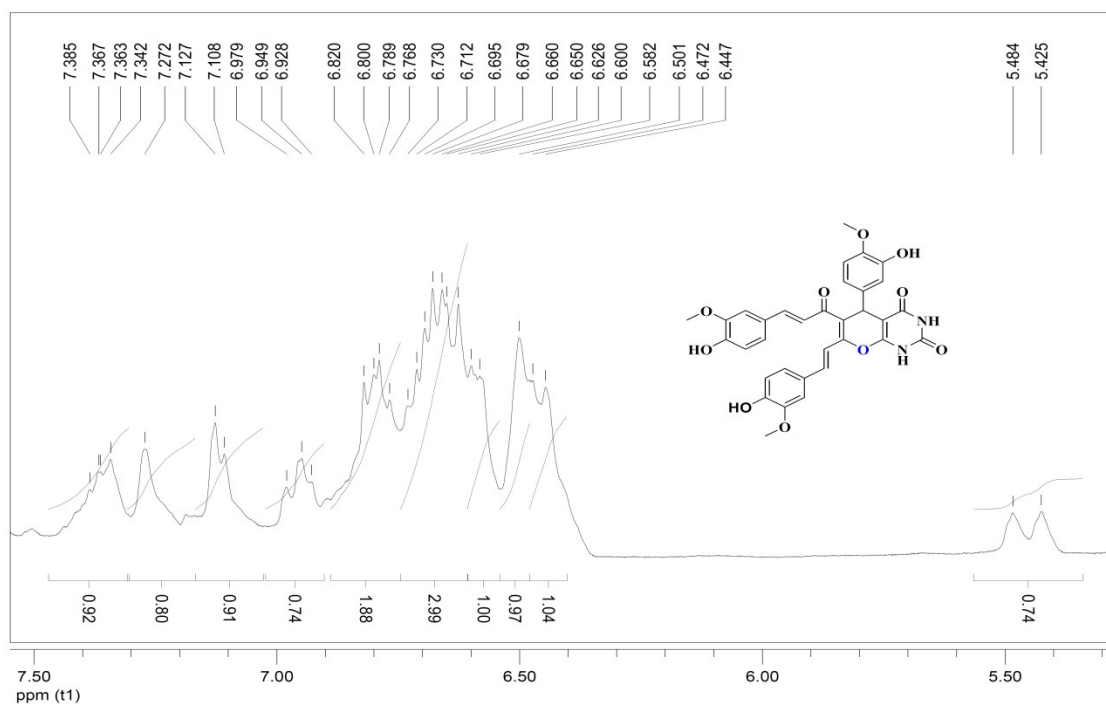

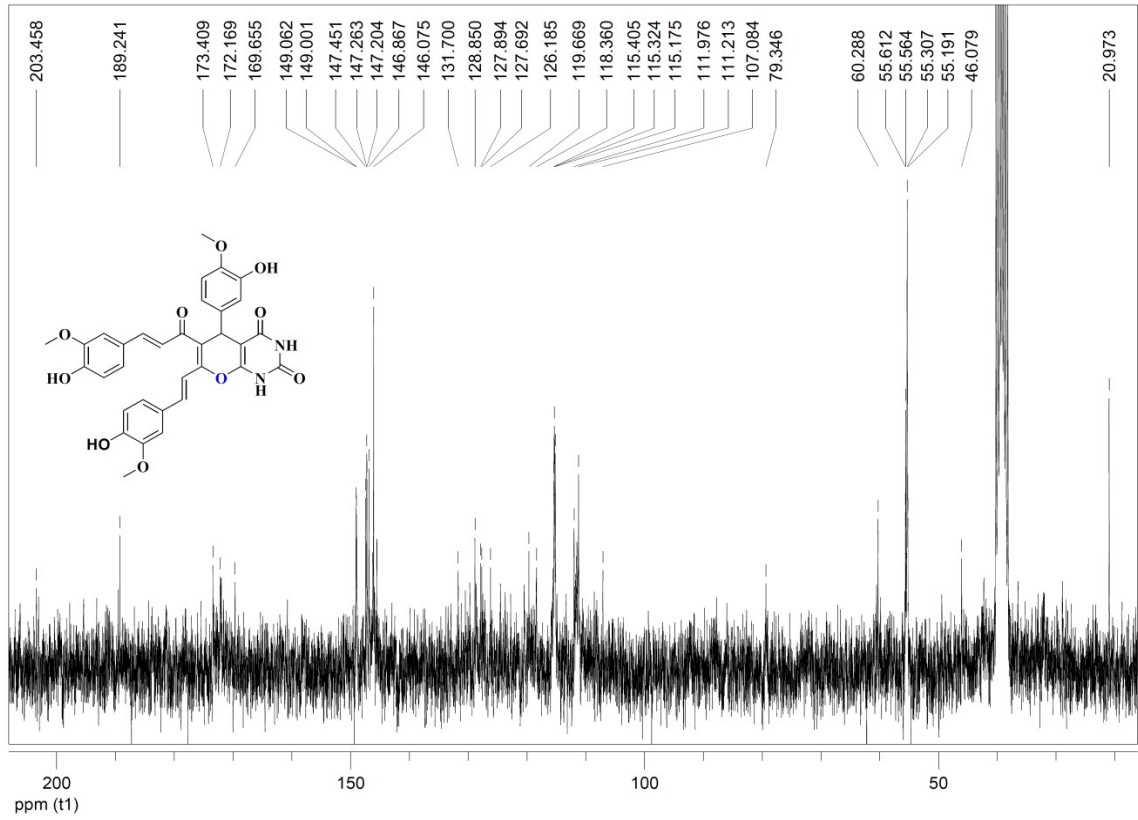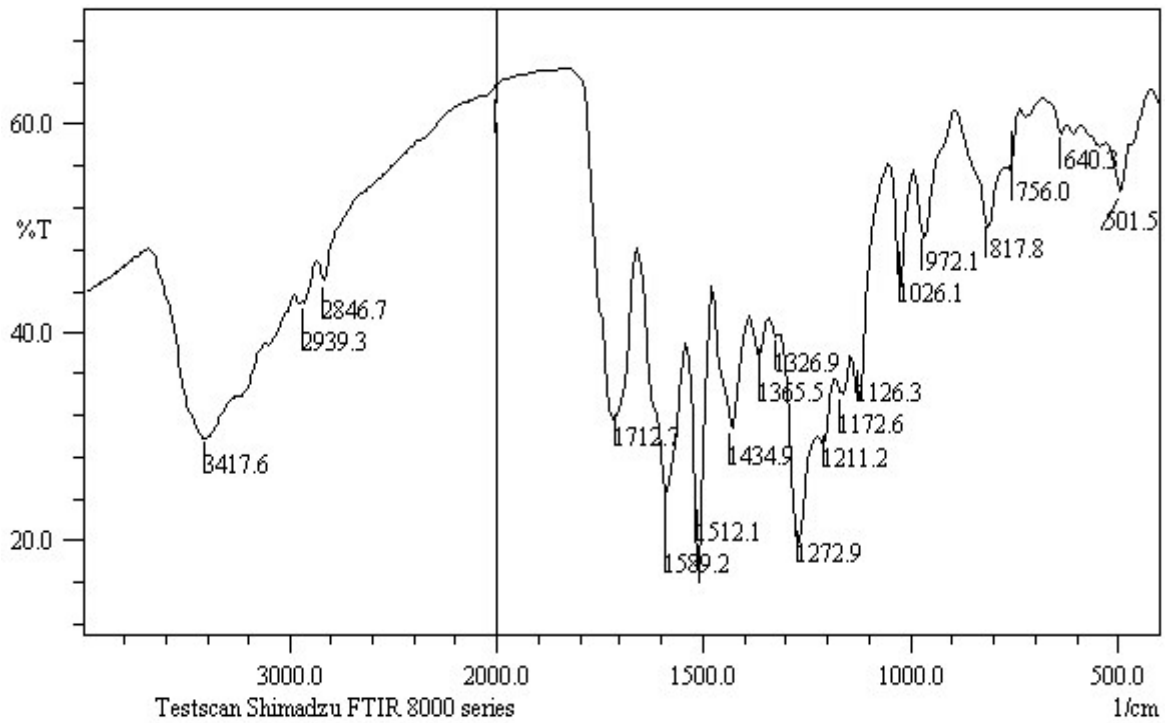

11.  $^1\text{H}$  NMR,  $^{13}\text{C}$  NMR & IR of Compound **4k**

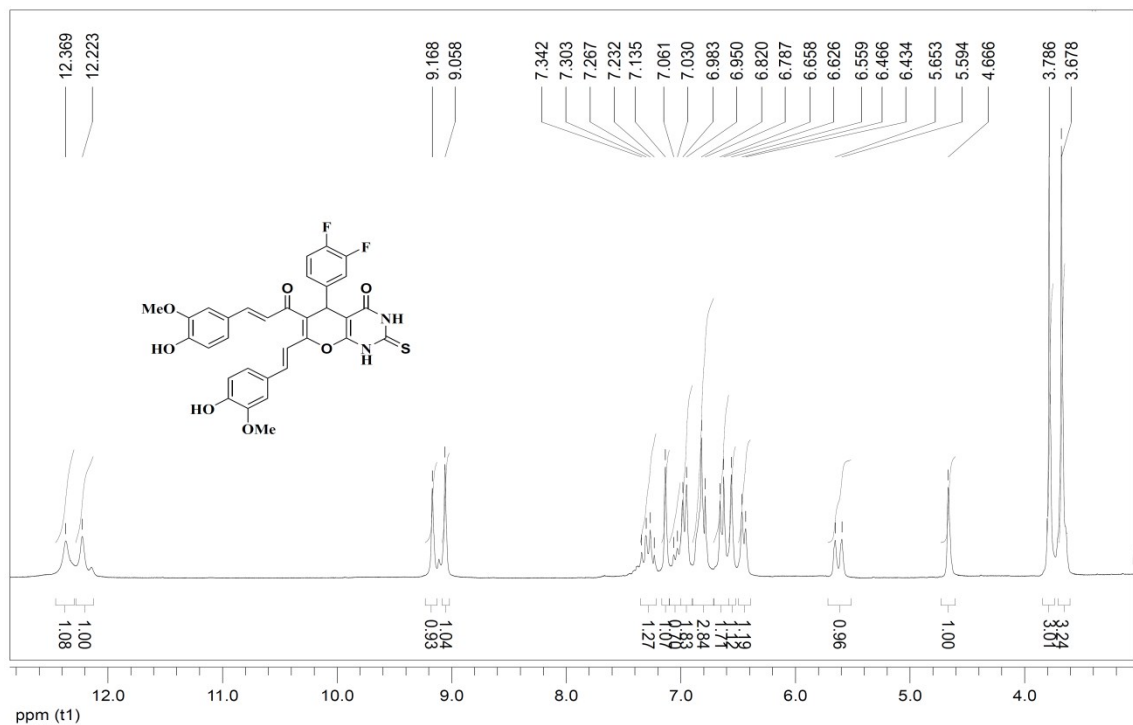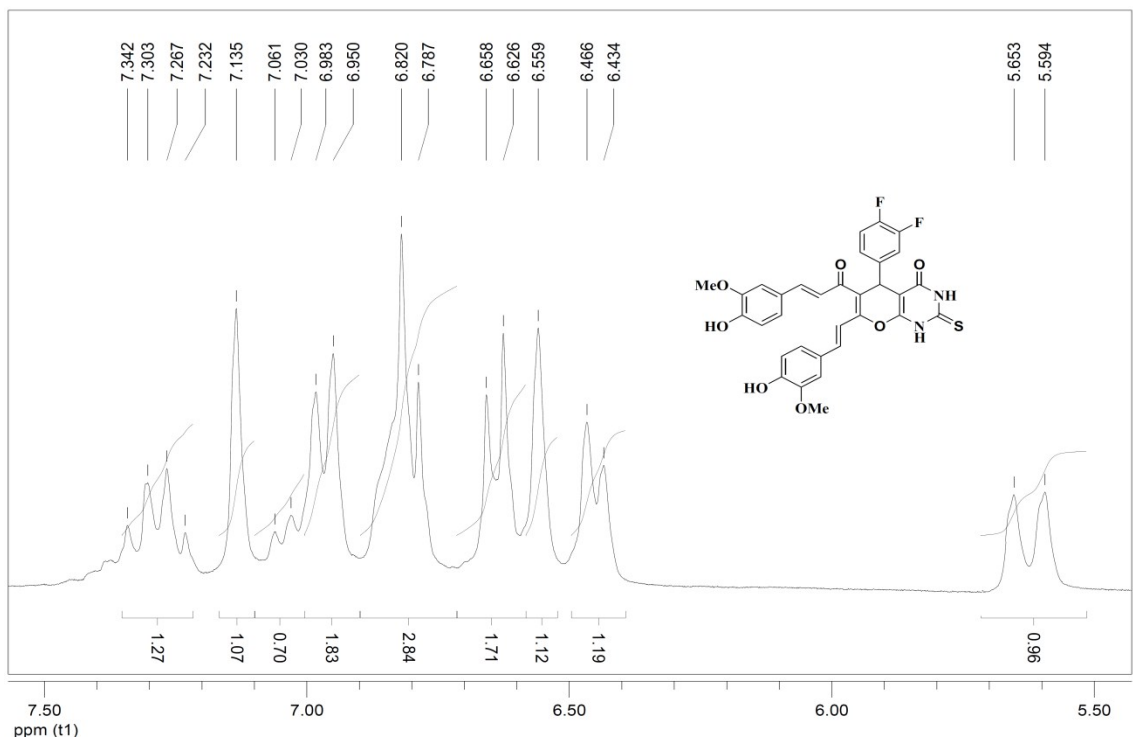

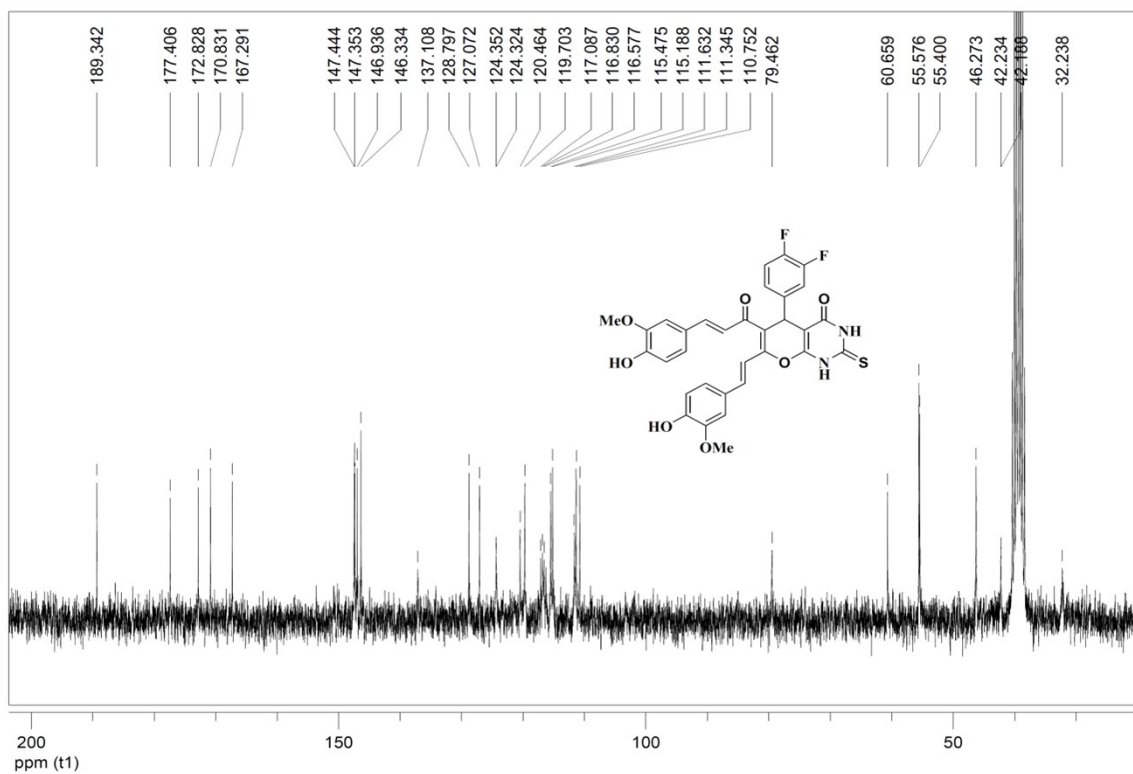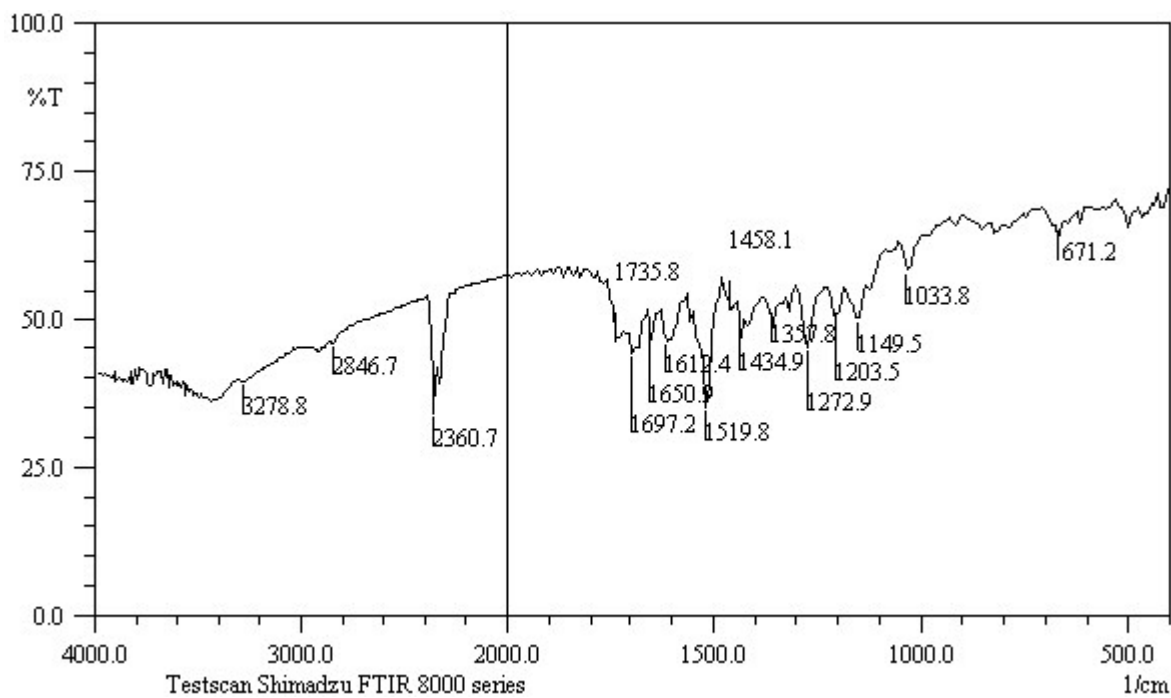

12. <sup>1</sup>H NMR, <sup>13</sup>C NMR & IR of Compound 4I

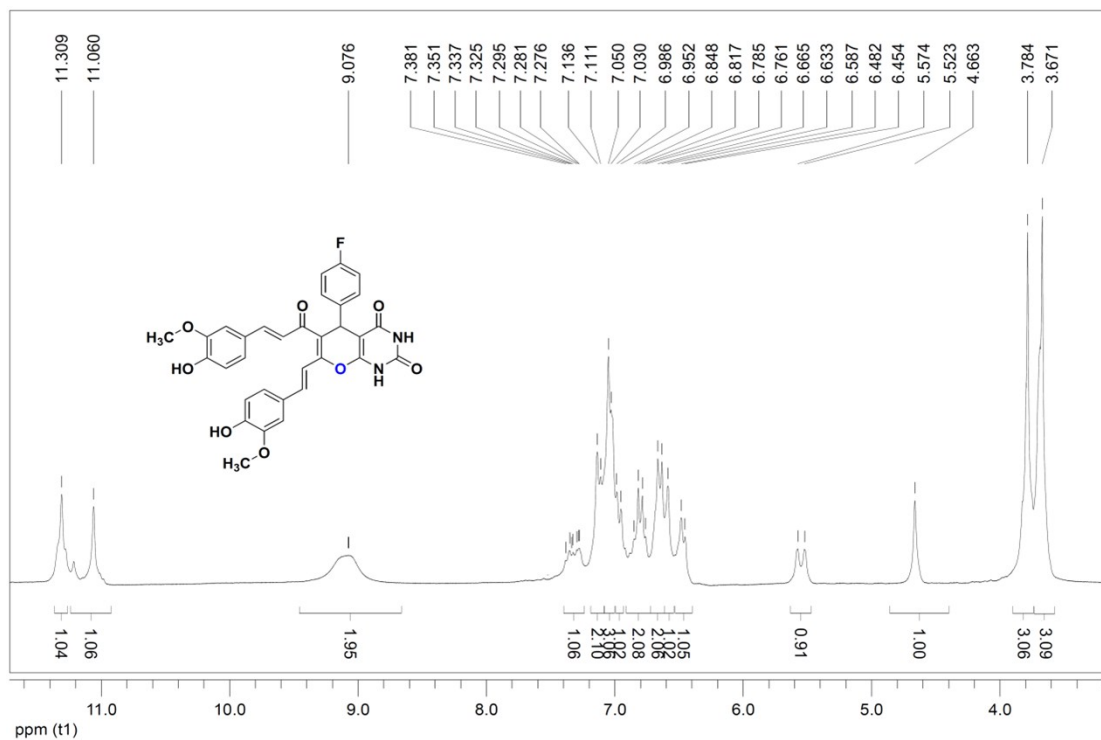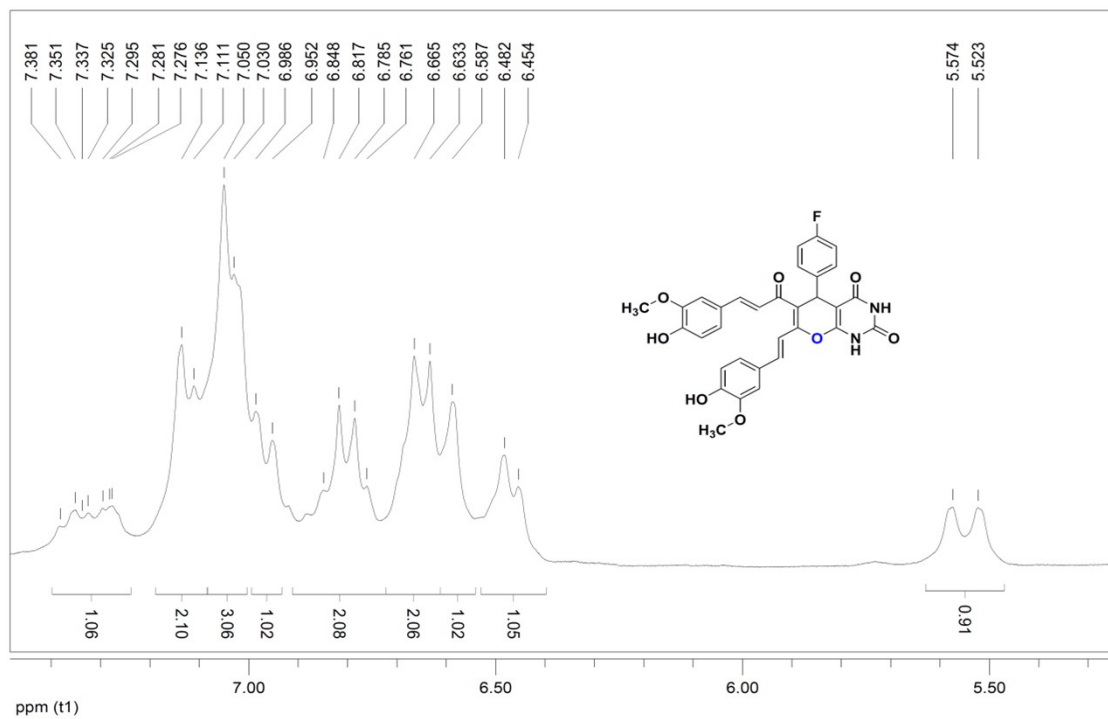

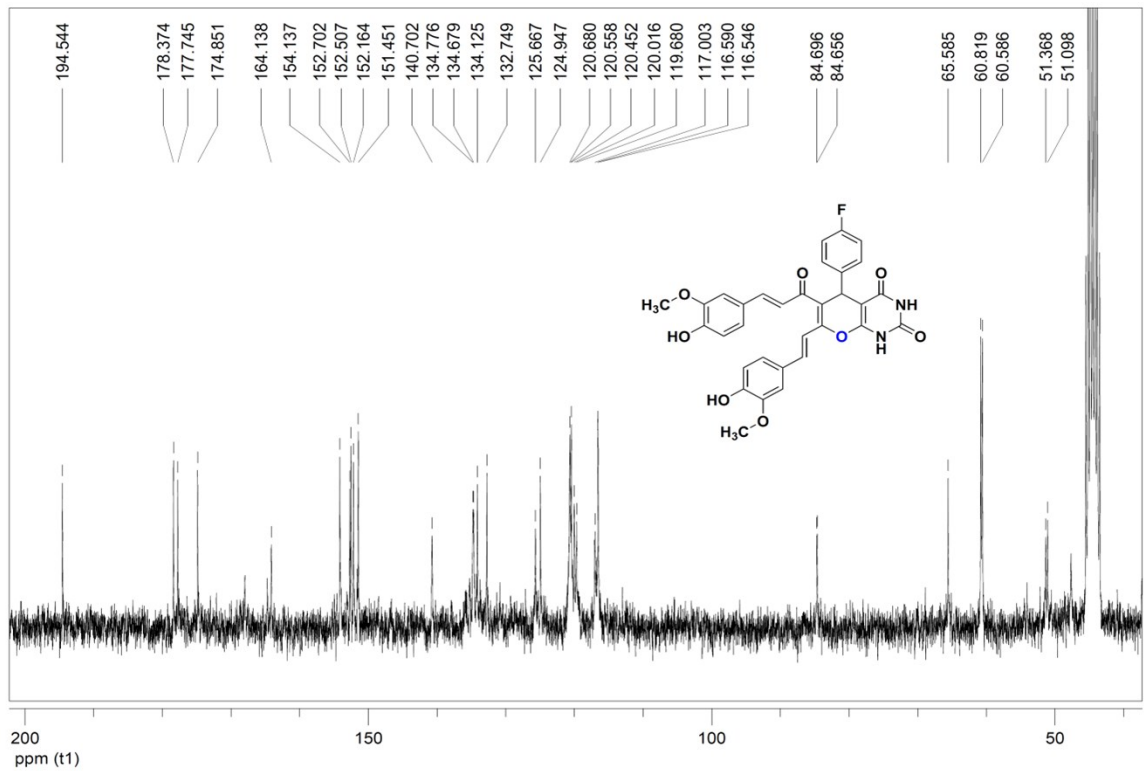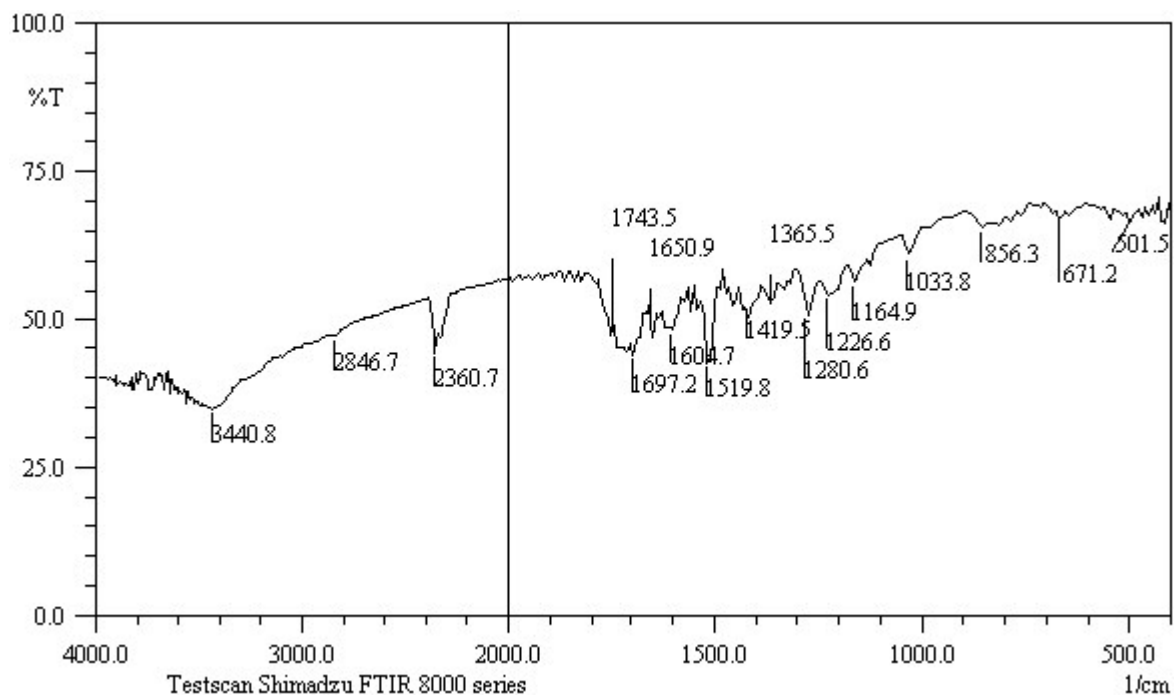

13. <sup>1</sup>H NMR, <sup>13</sup>C NMR & IR of Compound **4m**

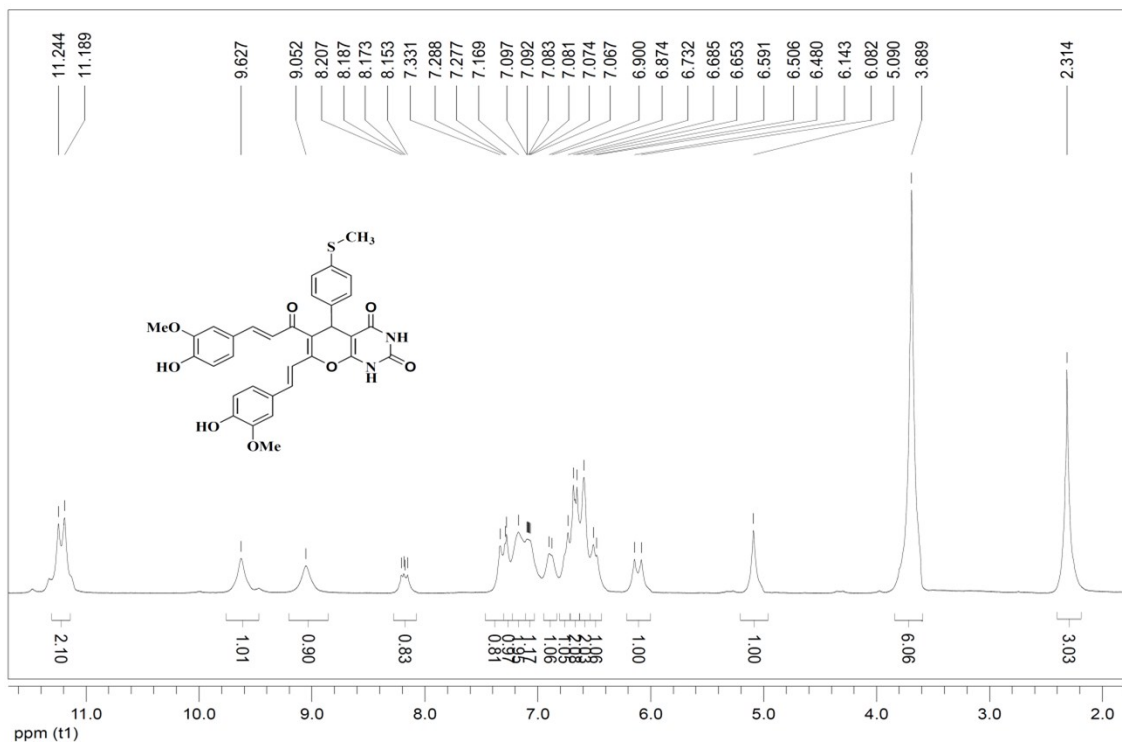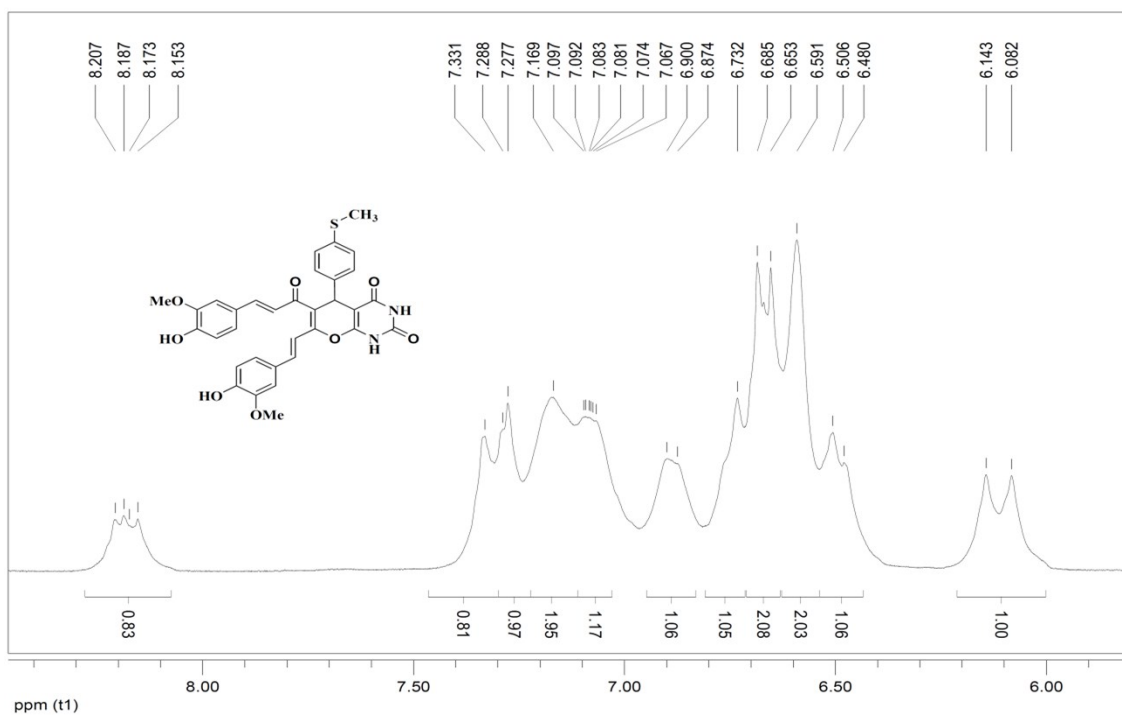



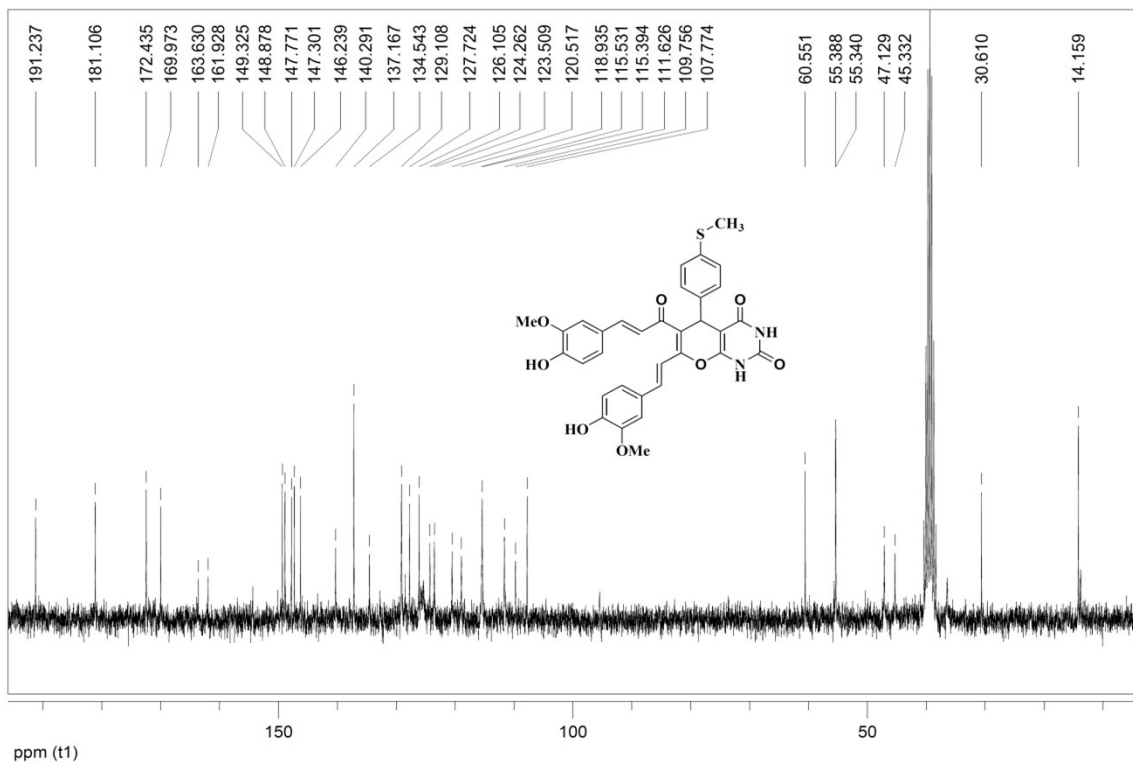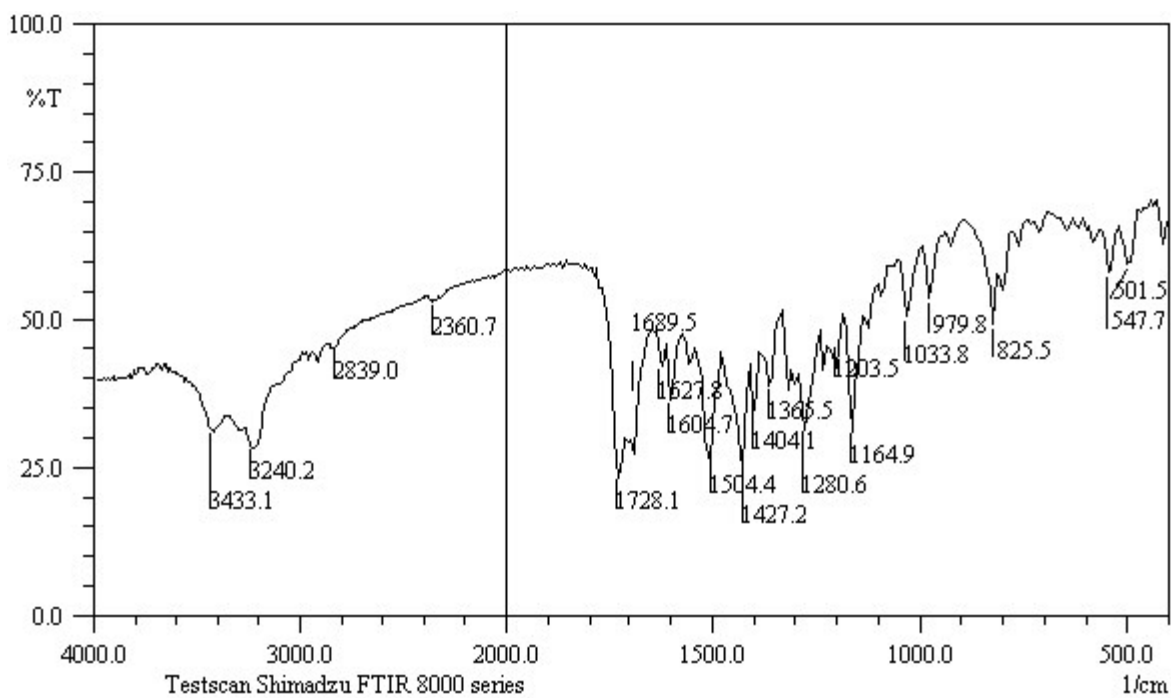

14. <sup>1</sup>H NMR and IR of Compound **4n**

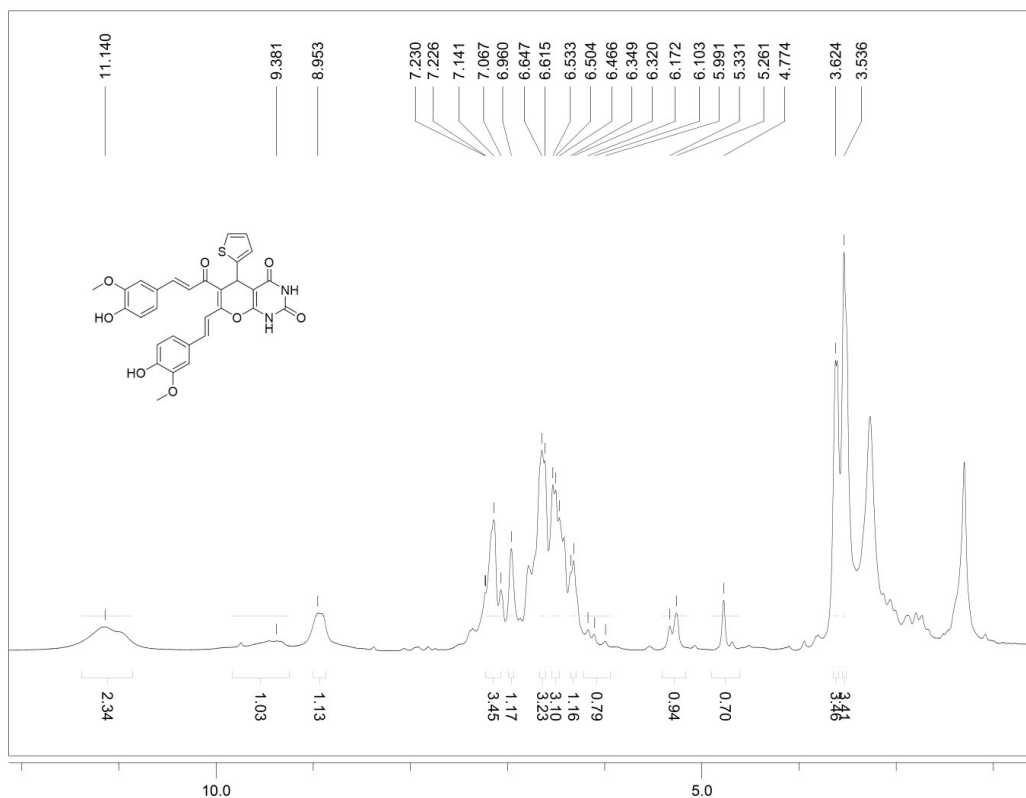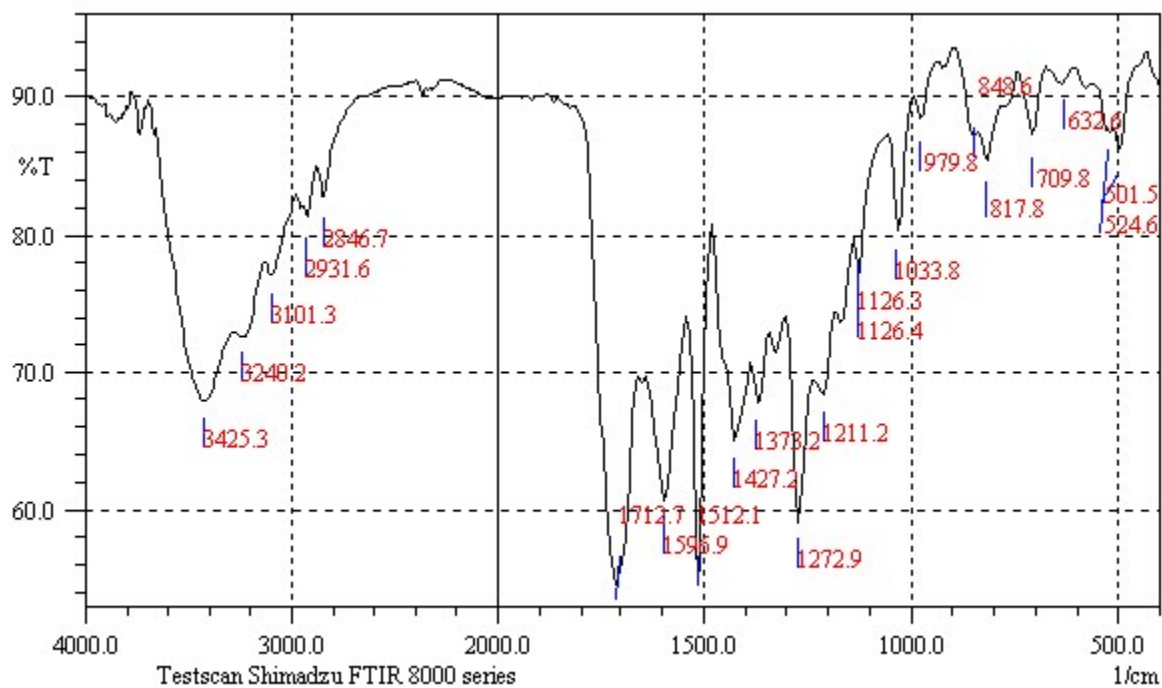

15.  $^1\text{H}$  NMR and IR of Compound **4o**

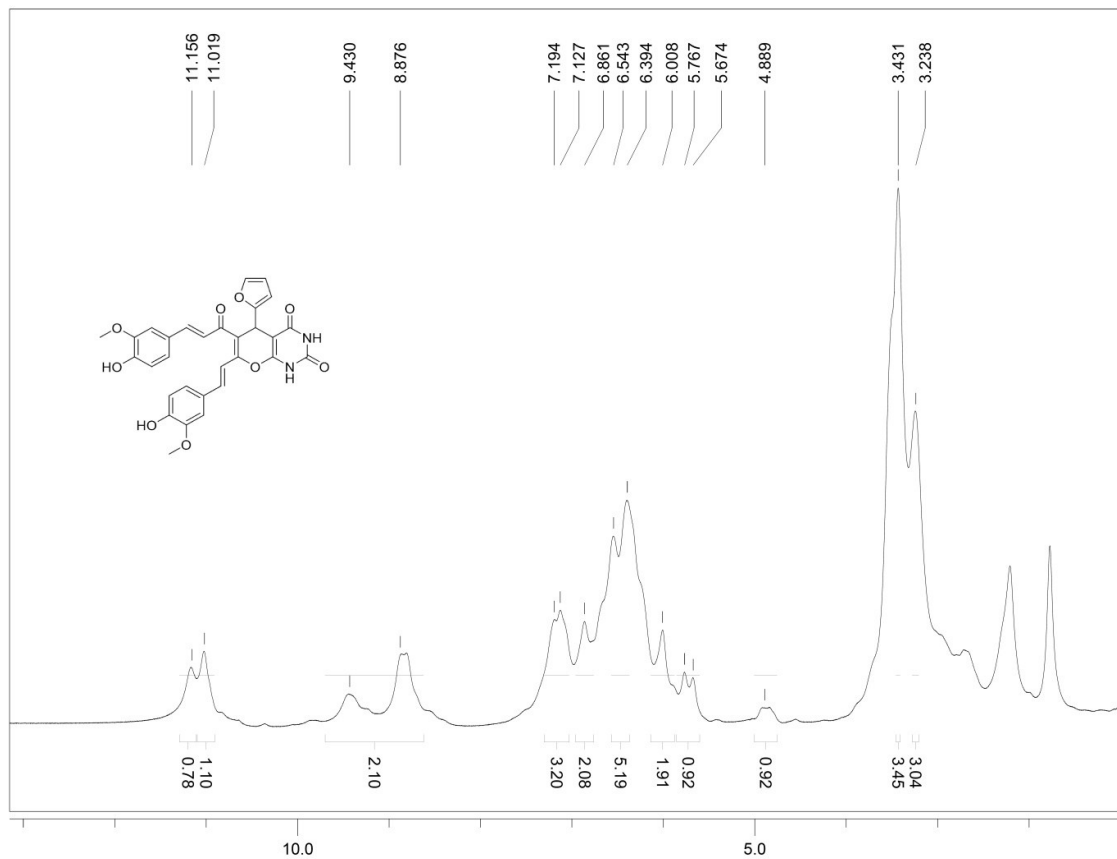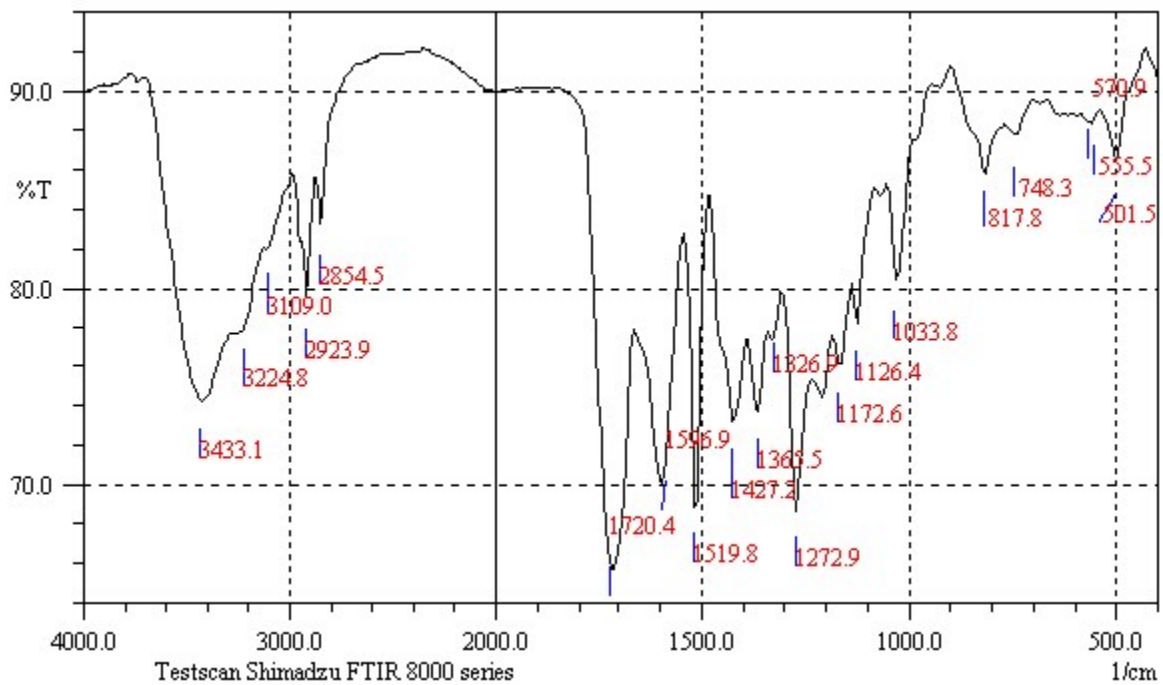

Supplement: c7nj02370g1.pdf [file c7nj02370g1.pdf]
